# Supplementary material
Source: publisher figshare collection journal article supplement (https://acs.figshare.com/ndownloader/files/14773376)
Supplement: Supplementary file 1 [file 14773376]

## Sheet: cage-feces-HMDB and EML
Supplemental Table S8. List of peak pairs matched to the metabolite entries in the HMDB and EML libraries based on accurate mass search from the cage feces samples. By clicking the number in the "matched #" column, the matched entry or entries from the website, www.MyCompoundID.org, will be displayed.
No	rt	mz_light	mz_heavy	mz	distance	int_heavy	nCharge	nTag	# Matched Entries	# Matched Entries
1	80.34	296.033	298.038	61.9744	2.00508	78633.3	1	1	0	0
2	80.48	429.17	431.176	195.112	2.00605	57900	1	1	0	1
3	81.855	551.179	553.188	317.121	2.00819	37200	1	1	0	13
4	82.79	922.262	924.269	688.203	2.00702	30000	1	1	0	0
5	83.1125	590.024	592.026	355.966	2.00212	7320	1	1	0	1
6	83.4967	738.228	740.233	504.169	2.005	48400	1	1	7	42
7	84.87	387.068	389.075	153.01	2.00685	66200	1	1	0	11
8	84.9855	403.064	405.07	169.006	2.00586	26454.5	1	1	1	9
9	85.4	549.166	551.176	315.107	2.01089	55750	1	1	0	27
10	85.5575	409.154	411.161	175.096	2.00631	217000	1	1	2	13
11	85.83	381.112	383.118	147.053	2.00631	2810000	1	1	6	55
12	87.48	515.19	517.198	562.264	2.00745	7170	2	2	0	5
13	88.0925	286.031	288.035	51.9725	2.0043	31625	1	1	0	1
14	88.4	424.16	426.163	380.203	2.00295	5410	2	2	0	2
15	88.44	308.012	310.016	73.9539	2.00388	9230	1	1	0	0
16	89.42	452.15	454.156	218.092	2.006	23800	1	1	2	15
17	90.29	474.177	476.18	480.237	2.00316	4070	2	2	1	23
18	90.8	313.068	315.074	79.0102	2.00576	18700	1	1	0	2
19	90.93	507.187	509.195	273.129	2.0077	14900	1	1	0	6
20	91.231	760.209	762.216	526.151	2.00728	21410	1	1	0	6
21	91.78	366.112	368.118	132.053	2.00651	56500	1	1	5	20
22	92.44	383.13	385.134	149.072	2.00403	9100	1	1	4	36
23	92.72	598.156	600.164	364.098	2.00769	28550	1	1	0	8
24	93.875	359.073	361.079	125.015	2.0064	756562	1	1	1	5
25	94.7567	389.127	391.134	155.069	2.00714	111233	1	1	1	14
26	94.82	487.178	489.182	506.239	2.00407	4520	2	2	0	0
27	95.95	558.164	560.17	324.105	2.0066	40566.7	1	1	0	36
28	97.695	420.158	422.165	372.2	2.00731	3815	2	2	0	10
29	98.26	431.136	433.143	197.077	2.00693	60200	1	1	0	28
30	99.92	578.181	580.185	344.123	2.00332	10100	1	1	0	29
31	100.583	505.173	507.181	271.115	2.00825	47850	1	1	0	12
32	102.264	367.096	369.103	133.038	2.0064	1324420	1	1	3	28
33	102.857	403.039	405.042	168.981	2.00346	14540	1	1	0	2
34	103.91	519.188	521.191	285.129	2.00319	61600	1	1	1	9
35	103.911	412.992	414.998	178.934	2.00567	4779.23	1	1	0	0
36	104.557	397.021	399.027	162.963	2.00544	16151.7	1	1	0	0
37	104.566	540.2	542.207	306.142	2.00616	98105.7	1	1	0	11
38	104.823	458.149	460.156	224.091	2.00632	51624.2	1	1	1	34
39	105.155	359.073	361.079	125.015	2.00579	2.36333e+06	1	1	1	5
40	105.33	508.186	510.191	274.127	2.00538	19023.3	1	1	1	10
41	105.353	381.111	383.117	147.053	2.00554	1241500	1	1	6	55
42	105.59	461.151	463.157	227.093	2.00531	39600	1	1	1	12
43	106.094	720.216	722.224	486.157	2.0089	30381.2	1	1	0	20
44	106.44	409.154	411.161	175.096	2.0061	185500	1	1	2	13
45	107.21	482.193	484.2	248.135	2.00698	56050	1	1	0	15
46	107.89	742.204	744.212	508.146	2.00776	7900	1	1	0	4
47	108.92	517.151	519.157	283.092	2.00644	48850	1	1	2	48
48	109.149	558.164	560.171	324.106	2.00716	55218.2	1	1	0	33
49	109.33	366.147	368.155	132.089	2.00796	18500	1	1	2	17
50	109.444	491.193	493.2	257.135	2.00677	74730	1	1	0	6
51	109.897	396.111	398.118	162.053	2.00668	110661	1	1	5	82
52	110.737	413.138	415.144	179.079	2.006	105300	1	1	3	42
53	110.74	542.208	544.217	308.15	2.00844	16200	1	1	0	5
54	113.283	403.144	405.149	169.085	2.00574	59940	1	1	2	11
55	114.004	388.108	390.114	154.049	2.00637	1.02278e+06	1	1	0	14
56	114.015	466.175	468.18	232.117	2.0051	24072.5	1	1	1	12
57	114.089	438.168	440.174	204.11	2.0058	39982.4	1	1	0	11
58	115.22	255.085	257.09	21.0264	2.00496	17400	1	1	0	1
59	115.275	576.176	578.182	342.117	2.00597	198391	1	1	13	51
60	115.807	446.167	448.176	424.217	2.00891	5886.67	2	2	0	5
61	116.83	458.168	460.173	448.22	2.00417	8020	2	2	0	6
62	119.222	366.114	368.118	132.055	2.00461	111640	1	1	5	20
63	119.374	720.217	722.225	486.159	2.00817	47577.8	1	1	0	20
64	119.397	339.101	341.108	105.043	2.00663	721667	1	1	2	21
65	120.31	560.176	562.186	326.118	2.00952	20266.7	1	1	3	49
66	121.17	420.153	422.16	372.189	2.00697	3500	2	2	0	6
67	123.09	459.173	461.178	450.229	2.00513	4910	2	2	0	18
68	123.28	363.137	365.143	129.079	2.00642	87400	1	1	4	30
69	123.39	380.164	382.17	146.105	2.00633	287273	1	1	4	23
70	123.807	317.13	319.137	83.0721	2.00643	15856	1	1	0	2
71	124.87	446.177	448.18	424.237	2.0034	8580	2	2	0	9
72	125.098	277.102	279.109	43.0434	2.00724	32544.4	1	1	0	4
73	126.22	482.195	484.2	248.137	2.0049	17700	1	1	1	17
74	126.73	509.176	511.184	275.117	2.00841	50200	1	1	0	9
75	126.79	380.125	382.134	146.067	2.00815	192000	1	1	4	29
76	126.876	380.13	382.137	146.072	2.00623	359857	1	1	4	39
77	127.46	352.135	354.143	236.152	2.00856	5290	2	2	0	4
78	127.722	438.169	440.175	204.111	2.00613	107852	1	1	0	12
79	127.77	400.146	402.156	332.175	2.01029	6040	2	2	0	6
80	129.243	381.112	383.118	147.054	2.00624	2451500	1	1	6	55
81	130.07	360.112	362.119	126.054	2.00636	41900	1	1	2	3
82	130.687	476.161	478.167	242.103	2.00569	69185.7	1	1	0	12
83	130.93	408.17	410.177	174.112	2.00668	1.26272e+06	1	1	3	11
84	131.3	350.13	352.134	232.144	2.00374	5500	2	2	0	10
85	131.552	392.127	394.134	158.069	2.00634	88533.3	1	1	0	20
86	131.67	462.177	464.18	456.237	2.00324	4050	2	2	1	3
87	131.97	452.152	454.157	218.093	2.00489	75581	1	1	2	15
88	133.13	418.161	420.167	368.204	2.00686	4280	2	2	0	5
89	134.56	444.166	446.17	420.215	2.00449	4220	2	2	0	23
90	134.75	428.158	430.167	388.2	2.00869	5525	2	2	0	5
91	134.756	576.176	578.183	342.117	2.00693	57657.1	1	1	13	51
92	134.875	413.139	415.144	179.081	2.00495	103674	1	1	3	42
93	135.583	560.179	562.186	326.121	2.00732	54710.3	1	1	3	41
94	136.317	399.109	401.112	165.05	2.00388	128000	1	1	1	10
95	136.42	365.132	367.135	131.074	2.00324	28600	1	1	2	10
96	136.967	293.107	295.113	59.0491	2.00598	37351.3	1	1	1	1
97	137.03	445.166	447.174	422.216	2.0082	9830	2	2	0	1
98	137.97	339.101	341.108	105.043	2.00644	323000	1	1	2	21
99	138.045	383.12	385.129	149.062	2.0087	54500	1	1	0	0
100	138.49	443.171	445.175	418.225	2.00398	5090	2	2	0	1
101	138.6	402.11	404.115	168.051	2.00563	65500	1	1	0	21
102	138.663	598.157	600.163	364.099	2.00592	38683.6	1	1	0	8
103	140.935	380.128	382.134	146.069	2.00652	821958	1	1	4	39
104	141.848	489.18	491.186	255.122	2.00608	79836.7	1	1	0	7
105	142.53	502.142	504.15	268.084	2.00789	39600	1	1	4	32
106	142.755	366.112	368.117	132.054	2.00509	474250	1	1	5	20
107	143.137	383.13	385.135	149.072	2.0048	32330	1	1	4	36
108	145.835	542.171	544.177	308.113	2.00602	46900	1	1	0	31
109	146.245	558.177	560.183	324.119	2.00608	80700	1	1	0	12
110	147.061	349.123	351.128	115.065	2.00531	23021.5	1	1	2	33
111	147.402	452.15	454.155	218.092	2.00555	18380	1	1	2	15
112	148.37	558.184	560.19	324.125	2.00592	10400	1	1	0	5
113	148.947	558.167	560.176	324.109	2.00885	73058.3	1	1	0	34
114	149.15	397.139	399.147	163.081	2.008	53300	1	1	2	27
115	149.183	277.103	279.111	43.0445	2.00782	18025	1	1	0	4
116	149.58	447.167	449.175	426.218	2.00795	5550	2	2	0	9
117	150.361	422.21	424.216	188.151	2.00631	190337	1	1	1	4
118	150.714	409.154	411.16	175.096	2.00608	776391	1	1	2	13
119	150.87	569.219	571.22	670.321	2.00159	8520	2	2	0	4
120	150.958	408.17	410.177	174.112	2.00637	408103	1	1	3	11
121	152.23	350.132	352.137	232.147	2.00485	7205	2	2	0	10
122	153.315	738.227	740.236	504.169	2.00867	14650	1	1	7	42
123	154.135	858.21	860.217	624.151	2.00701	16550	1	1	0	2
124	154.37	380.132	382.137	146.073	2.00475	2150000	1	1	4	39
125	154.96	339.138	341.142	105.08	2.00435	12000	1	1	1	14
126	155.114	462.18	464.185	228.122	2.0052	42520	1	1	0	3
127	155.365	317.129	319.136	83.0706	2.00663	16300	1	1	0	2
128	156.5	431.166	433.174	394.216	2.00811	5920	2	2	0	5
129	159.168	339.101	341.108	105.043	2.00628	1649000	1	1	2	21
130	160.03	388.108	390.114	154.049	2.00652	185833	1	1	0	14
131	161.6	417.154	419.164	366.191	2.01019	6650	2	2	0	7
132	161.95	373.147	375.153	278.177	2.00577	6610	2	2	0	3
133	162.288	355.128	357.137	121.07	2.00915	23516.7	1	1	0	21
134	162.445	355.133	357.138	121.074	2.00568	29660	1	1	0	21
135	163.533	448.167	450.173	428.217	2.00618	4703.33	2	2	0	5
136	163.545	510.158	512.163	276.1	2.00504	38450	1	1	1	21
137	163.579	431.137	433.143	197.078	2.00634	88188.9	1	1	0	28
138	164.313	338.117	340.123	104.059	2.00592	61660	1	1	1	10
139	164.65	446.169	448.175	424.222	2.00572	5020	2	2	0	6
140	165.26	392.128	394.134	158.069	2.00621	400286	1	1	0	20
141	165.27	244.093	246.1	20.0691	2.00707	7260	2	2	0	0
142	166.122	367.096	369.102	133.038	2.00629	1.45358e+06	1	1	3	28
143	167.601	440.148	442.156	206.09	2.00772	40455.8	1	1	0	30
144	169.142	366.145	368.152	132.086	2.00693	24800	1	1	2	17
145	169.791	558.166	560.173	324.108	2.00681	67078.5	1	1	0	34
146	170.43	428.147	430.151	388.178	2.0035	7120	2	2	0	4
147	170.455	380.134	382.142	146.076	2.00794	184500	1	1	0	11
148	171.009	409.154	411.16	175.096	2.00619	2.32373e+06	1	1	2	13
149	171.31	474.177	476.18	480.237	2.00272	5570	2	2	1	23
150	171.35	417.168	419.171	366.22	2.00255	6360	2	2	0	4
151	171.35	349.123	351.128	115.064	2.00536	53000.3	1	1	2	33
152	171.874	576.175	578.182	342.117	2.00657	38157.1	1	1	13	51
153	172.181	364.132	366.139	130.074	2.00664	108430	1	1	0	18
154	172.528	696.112	698.115	462.054	2.00261	12133.7	1	1	0	2
155	172.81	293.113	295.118	118.11	2.00425	6290	2	2	0	4
156	175.034	372.148	374.155	138.09	2.00676	17480	1	1	0	3
157	176.29	482.162	484.166	248.103	2.00479	32409.1	1	1	0	23
158	178.158	369.147	371.154	135.089	2.00728	15810.4	1	1	0	18
159	178.209	339.101	341.107	105.043	2.00631	2.51391e+06	1	1	2	21
160	179.41	392.127	394.133	158.069	2.00599	173000	1	1	0	20
161	179.41	431.137	433.143	197.078	2.00636	99000	1	1	0	28
162	180.005	359.134	361.142	250.151	2.00772	7290	2	2	0	3
163	180.85	325.123	327.128	91.0645	2.00475	20050	1	1	0	18
164	181.482	414.123	416.128	180.064	2.00559	38725	1	1	17	88
165	181.891	381.112	383.118	147.054	2.00626	1.9326e+06	1	1	6	55
166	182.123	422.203	424.21	188.144	2.00732	48400	1	1	2	13
167	182.188	399.105	401.111	165.047	2.00584	1.02347e+06	1	1	4	24
168	183.831	452.15	454.155	218.091	2.00556	53062.5	1	1	2	15
169	184.43	304.124	306.128	140.131	2.00392	3550	2	2	0	0
170	184.43	380.163	382.17	146.105	2.00628	133000	1	1	4	23
171	184.92	472.169	474.177	476.222	2.00815	4840	2	2	1	4
172	185.146	424.149	426.154	190.091	2.00521	27181.8	1	1	1	13
173	185.235	317.132	319.138	83.0732	2.00602	12950	1	1	0	2
174	185.62	424.129	426.139	190.071	2.00964	27100	1	1	0	17
175	185.798	367.096	369.103	133.038	2.00629	2.25313e+06	1	1	3	28
176	185.92	353.117	355.123	119.058	2.00628	195320	1	1	3	35
177	186.771	345.137	347.144	111.079	2.00677	21915.8	1	1	1	4
178	187.227	424.142	426.149	190.083	2.00723	35300	1	1	1	17
179	187.516	558.165	560.173	324.107	2.00807	41700	1	1	0	34
180	188.42	358.136	360.143	248.156	2.00717	4220	2	2	0	5
181	188.666	307.123	309.129	73.0648	2.00598	25414.3	1	1	1	2
182	189.196	313.031	315.037	78.9727	2.00582	50401.6	1	1	0	1
183	189.275	550.197	552.202	316.138	2.00522	50000	1	1	0	6
184	190.133	242.572	244.579	17.0272	2.00665	2.54786e+06	2	2	1	21
185	190.34	349.132	351.136	230.147	2.00448	5260	2	2	0	6
186	190.933	339.101	341.107	105.043	2.00626	4.88125e+06	1	1	2	21
187	191.655	501.155	503.16	267.097	2.00498	115245	1	1	3	57
188	191.74	285.528	287.534	102.94	2.00542	7712.35	2	2	0	0
189	192.467	261.545	263.552	54.974	2.00657	106866	2	2	0	2
190	193.604	399.105	401.111	165.047	2.00582	833259	1	1	4	24
191	194.276	436.154	438.16	202.096	2.00595	44808.3	1	1	0	20
192	194.417	272.036	274.04	37.9776	2.00432	19266.7	1	1	0	0
193	194.903	458.168	460.174	224.11	2.00586	26650	1	1	0	3
194	196.58	436.171	438.174	202.112	2.00355	59000	1	1	0	5
195	198.007	410.138	412.144	176.08	2.00539	77463.2	1	1	0	18
196	198.159	424.154	426.16	190.096	2.00605	36250	1	1	1	15
197	198.771	505.617	507.624	271.559	2.00628	14330.8	1	1	0	0
198	199.22	973.279	975.286	739.22	2.00747	72900	1	1	0	0
199	199.92	325.119	327.128	91.0605	2.00881	19300	1	1	0	19
200	200.366	381.112	383.118	147.053	2.00621	7.00394e+06	1	1	6	55
201	201.822	290.567	292.573	56.5084	2.00582	10612	1	1	0	0
202	201.875	277.101	279.108	43.0427	2.00688	14050	1	1	0	4
203	202.495	484.327	488.339	17.2181	4.01203	1480000	1	2	0	0
204	202.66	438.134	440.14	204.076	2.00536	53320	1	1	2	22
205	203.807	367.096	369.102	133.038	2.00631	4.44799e+06	1	1	3	28
206	203.978	282.059	284.067	96.0019	2.00744	19027.3	2	2	0	3
207	204.503	381.28	383.288	147.221	2.00879	880667	1	1	0	0
208	204.778	456.171	458.174	222.113	2.00329	45870	1	1	0	14
209	206.097	261.545	263.552	54.9742	2.0065	108250	2	2	0	2
210	206.158	242.572	244.579	17.0274	2.00663	2.46197e+06	2	2	1	21
211	206.513	454.161	456.171	220.103	2.00931	43600	1	1	1	13
212	206.938	278.096	280.102	44.0374	2.0064	73000	1	1	0	1
213	209.3	523.193	525.195	289.134	2.00177	25700	1	1	0	11
214	209.94	352.13	354.137	118.071	2.00743	36950	1	1	2	12
215	210.598	505.618	507.623	271.559	2.00573	12505.6	1	1	0	0
216	211.11	397.135	399.145	163.077	2.00962	11000	1	1	0	0
217	211.21	458.174	460.181	224.116	2.00641	54675	1	1	0	10
218	211.938	523.186	525.191	289.128	2.00535	56366.7	1	1	1	15
219	213.64	420.191	422.201	186.133	2.01008	40100	1	1	0	4
220	214.526	381.112	383.118	147.053	2.00627	6.21572e+06	1	1	6	55
221	217.07	392.156	394.16	316.196	2.00419	8920	2	2	0	7
222	217.89	322.124	324.13	88.0652	2.00596	27825	1	1	0	12
223	218.292	282.061	284.067	96.0044	2.00672	16937.1	2	2	0	1
224	219.09	323.131	325.137	178.146	2.00563	10810	2	2	0	0
225	219.18	242.572	244.579	17.0272	2.00668	2.06334e+06	2	2	1	21
226	219.327	282.065	284.07	96.0125	2.00498	18766.7	2	2	0	0
227	220.17	497.187	499.19	526.258	2.00286	11500	2	2	0	2
228	220.577	461.184	463.19	227.126	2.00613	28015.6	1	1	0	2
229	221.2	367.118	369.123	133.06	2.00507	76750	1	1	0	2
230	222.17	434.167	436.173	400.218	2.00616	11100	2	2	0	2
231	222.416	365.117	367.123	131.059	2.00577	789681	1	1	8	60
232	222.736	253.563	255.568	19.5043	2.00566	65183.3	1	1	0	0
233	223.105	431.174	433.179	394.231	2.00523	6225	2	2	0	33
234	223.23	410.142	412.144	176.083	2.00266	45100	1	1	0	18
235	223.39	395.129	397.135	161.071	2.00537	45400	1	1	1	48
236	223.665	433.171	435.176	398.226	2.00473	6865	2	2	0	27
237	223.716	452.15	454.155	218.091	2.00582	99647.4	1	1	2	15
238	223.84	285.528	287.533	102.939	2.0056	10200	2	2	0	0
239	223.991	353.117	355.123	119.058	2.00641	47017.8	1	1	3	35
240	224.87	420.175	422.18	372.233	2.00525	8030	2	2	0	10
241	225.599	339.137	341.144	105.079	2.00678	39942.4	1	1	1	15
242	225.885	295.124	297.132	122.132	2.00801	5390	2	2	0	0
243	228.11	977.29	979.294	743.232	2.00334	4880	1	1	0	3
244	228.384	317.132	319.139	83.0733	2.00768	12587.5	1	1	0	2
245	229.626	414.122	416.128	180.064	2.00609	102112	1	1	17	88
246	230.237	367.124	369.129	133.065	2.00532	32489.4	1	1	0	0
247	231.245	458.174	460.18	224.116	2.00598	64350	1	1	0	10
248	231.928	251.086	253.093	17.0279	2.00669	36516000	1	1	1	21
249	232.08	309.091	311.097	75.0323	2.00637	1372125	1	1	1	21
250	234.293	282.061	284.068	96.0053	2.00682	8756.67	2	2	0	1
251	234.473	353.117	355.123	119.058	2.00644	1.46622e+06	1	1	3	35
252	234.99	422.175	424.179	188.116	2.004	14600	1	1	3	25
253	235.076	484.136	488.15	17.0268	4.01342	2.32299e+06	1	2	1	21
254	235.495	285.527	287.534	102.937	2.00675	4375	2	2	0	0
255	235.614	261.545	263.552	54.9738	2.00644	47909.1	2	2	0	2
256	235.9	431.141	433.147	197.083	2.00546	27800	1	1	0	28
257	235.98	402.145	404.149	168.086	2.00453	15400	1	1	1	16
258	237.268	479.197	481.204	245.139	2.00727	68880	1	1	0	11
259	238.025	543.186	545.196	309.128	2.01006	51774.2	1	1	0	9
260	238.683	521.201	523.205	287.143	2.00402	55000	1	1	0	0
261	238.763	367.128	369.134	133.07	2.00532	18485	1	1	0	40
262	238.899	292.111	294.118	58.0531	2.00676	27567.6	1	1	0	1
263	239.28	452.146	454.15	218.088	2.00339	31866.7	1	1	2	16
264	239.725	507.233	509.238	273.175	2.00471	62250	1	1	0	2
265	240.046	452.076	454.084	218.018	2.00784	43771.4	1	1	0	4
266	240.766	424.154	426.159	190.096	2.00511	56614.3	1	1	1	15
267	240.778	505.221	507.231	271.163	2.00956	134500	1	1	0	1
268	241.068	463.166	465.172	229.107	2.00617	38866.7	1	1	0	9
269	241.575	523.146	525.15	289.087	2.00461	261500	1	1	0	19
270	241.886	242.572	244.579	17.0271	2.00669	318625	2	2	1	21
271	242.203	243.572	245.579	19.0267	2.00731	33100	2	2	0	0
272	242.4	519.191	521.198	285.133	2.00675	59530	1	1	1	14
273	242.563	408.159	410.165	174.101	2.00576	68708.6	1	1	1	35
274	243.153	400.167	402.173	166.108	2.00663	26125	1	1	0	5
275	243.615	499.148	501.156	265.09	2.00806	78900	1	1	0	9
276	243.79	414.122	416.128	180.064	2.00601	271200	1	1	17	88
277	244.093	339.139	341.145	105.081	2.00512	11186.7	1	1	1	14
278	244.43	348.102	350.106	114.044	2.00366	180000	1	1	2	12
279	245.41	357.141	359.147	246.164	2.00664	12400	2	2	0	1
280	245.43	443.176	445.179	418.235	2.00341	6095	2	2	0	9
281	246.07	322.122	324.128	88.0635	2.00583	112550	1	1	0	12
282	246.347	379.132	381.138	145.074	2.00609	463418	1	1	6	54
283	246.6	265.103	267.111	62.0898	2.00818	5210	2	2	0	0
284	248.5	317.133	319.14	83.0747	2.00703	18400	1	1	0	2
285	249.75	395.128	397.134	161.069	2.00612	212917	1	1	1	48
286	250.724	438.169	440.175	204.111	2.00582	68365.4	1	1	0	12
287	251.38	466.168	468.172	232.109	2.00473	33108.3	1	1	2	23
288	252.46	434.169	436.175	400.222	2.0056	7650	2	2	0	1
289	255.276	309.09	311.097	75.0321	2.00634	5.39315e+06	1	1	1	21
290	255.63	492.178	494.186	258.12	2.00797	18300	1	1	0	9
291	255.937	353.117	355.123	119.058	2.0062	8.2129e+06	1	1	3	35
292	256.299	367.132	369.139	133.074	2.00607	286164	1	1	0	40
293	257.36	345.145	347.152	222.174	2.00648	5555	2	2	0	1
294	257.376	405.158	407.165	171.1	2.00662	49281.2	1	1	0	6
295	257.704	471.205	473.21	237.146	2.00557	48500	1	1	0	3
296	258.068	427.144	429.148	193.086	2.00417	52540	1	1	0	13
297	259.767	422.171	424.178	188.113	2.00679	46150	1	1	3	24
298	261.785	277.108	279.115	86.1003	2.00649	11300	2	2	0	1
299	261.81	515.203	517.207	562.29	2.00353	5360	2	2	0	31
300	264.889	295.111	297.117	61.0528	2.00638	9.24119e+06	1	1	1	15
301	265.055	337.158	339.165	103.1	2.00645	1.32416e+06	1	1	0	5
302	267.377	604.288	606.295	370.23	2.00646	38466.7	1	1	0	6
303	267.735	470.181	472.186	472.245	2.00466	4605	2	2	3	27
304	268.122	415.144	417.148	181.085	2.00464	51753.2	1	1	0	10
305	269.478	430.141	432.147	196.083	2.00622	47820	1	1	0	20
306	269.507	367.132	369.138	133.074	2.00553	69733.3	1	1	0	40
307	269.62	291.119	293.124	114.12	2.0052	4650	2	2	0	1
308	269.741	408.159	410.165	174.101	2.00607	337173	1	1	1	35
309	270.37	309.243	311.253	75.185	2.00972	1060000	1	1	0	0
310	270.842	309.09	311.097	75.0321	2.00633	8.97133e+06	1	1	1	21
311	271.075	425.14	427.145	191.082	2.00451	38350	1	1	0	32
312	274.99	415.156	417.163	362.194	2.00702	6980	2	2	0	3
313	275.93	371.15	373.155	274.184	2.0045	3960	2	2	0	0
314	276.582	387.143	389.148	153.085	2.00491	49683.3	1	1	0	0
315	276.82	441.161	443.166	207.103	2.00449	21833.3	1	1	1	11
316	276.853	348.139	350.144	114.081	2.00502	23778.6	1	1	1	4
317	276.88	337.152	339.158	103.093	2.00625	76200	1	1	0	0
318	277.051	387.124	389.132	153.066	2.00785	61087.5	1	1	1	11
319	277.277	387.118	389.128	153.06	2.00945	63400	1	1	0	3
320	277.433	387.133	389.139	153.075	2.00616	54866.7	1	1	3	26
321	278.315	303.121	305.128	69.0629	2.00721	17900	1	1	0	0
322	279.58	488.193	490.201	254.135	2.00806	124000	1	1	1	14
323	279.83	400.135	402.138	166.076	2.00397	8470	1	1	0	19
324	281.42	462.17	464.177	228.111	2.00755	62500	1	1	1	10
325	283.035	368.118	370.126	134.06	2.00732	25650	1	1	5	70
326	283.41	371.255	373.265	137.197	2.00992	5780	1	1	0	0
327	284.12	432.172	434.175	396.227	2.00385	5600	2	2	0	6
328	284.51	370.127	372.135	136.069	2.00857	160000	1	1	1	4
329	286.033	394.143	396.149	160.085	2.00605	249053	1	1	1	37
330	286.82	422.171	424.177	376.226	2.00518	5290	2	2	3	25
331	287.939	317.131	319.138	83.0725	2.00732	13786	1	1	0	2
332	288.045	334.122	336.129	100.064	2.00644	333636	1	1	0	3
333	288.436	350.153	352.159	116.095	2.00584	380600	1	1	1	9
334	288.52	292.113	294.118	116.109	2.0054	7930	2	2	1	2
335	292.019	408.158	410.164	174.1	2.00629	126654	1	1	1	35
336	292.188	480.18	482.185	246.122	2.00516	36711.1	1	1	2	20
337	293.02	408.153	410.163	174.095	2.01049	44700	1	1	0	0
338	293.032	466.165	468.171	232.107	2.00627	43833.3	1	1	2	23
339	293.16	478.128	480.136	244.07	2.00759	70800	1	1	3	32
340	294.149	365.118	367.125	131.06	2.00623	87620.3	1	1	8	60
341	294.699	337.142	339.149	103.084	2.00688	14388.9	1	1	0	0
342	294.8	467.189	469.194	466.261	2.00492	5130	2	2	4	35
343	295.73	436.154	438.162	202.096	2.00764	88135.7	1	1	0	20
344	296.25	733.275	735.287	998.434	2.01193	3780	2	2	0	0
345	296.39	585.23	587.236	702.344	2.00628	5380	2	2	0	1
346	296.657	384.113	386.117	150.054	2.00488	144909	1	1	10	65
347	297.053	337.135	339.141	103.076	2.00675	16937.5	1	1	0	0
348	297.06	372.135	374.142	138.077	2.00618	76112.1	1	1	0	4
349	297.206	438.164	440.174	204.106	2.00979	63588.9	1	1	0	0
350	297.75	591.317	593.325	357.258	2.00796	30900	1	1	0	0
351	297.85	309.126	311.133	75.0681	2.00674	62850	1	1	2	13
352	298.14	357.145	359.151	246.173	2.00585	4680	2	2	0	2
353	298.38	452.184	454.19	218.125	2.00627	62100	1	1	0	7
354	298.627	295.117	297.124	61.0591	2.00611	9006.67	1	1	0	1
355	299.19	399.156	401.164	330.196	2.00715	11400	2	2	0	10
356	299.3	529.21	531.217	590.303	2.00716	6400	2	2	0	6
357	300.27	335.135	337.143	101.077	2.00722	8630	1	1	0	0
358	300.925	373.122	375.128	139.064	2.00603	93200	1	1	1	18
359	301.012	576.247	578.253	342.189	2.00617	84906.6	1	1	0	0
360	301.46	334.139	336.143	200.161	2.00396	7780	2	2	0	0
361	302.01	414.157	416.163	360.197	2.00668	6710	2	2	2	26
362	302.343	445.19	447.196	211.132	2.00621	119291	1	1	0	1
363	303.597	464.15	466.158	230.092	2.00758	128800	1	1	2	21
364	304.46	471.185	473.189	474.254	2.00389	11000	2	2	0	2
365	304.51	305.126	307.133	71.0681	2.00647	13400	1	1	0	0
366	304.63	263.097	265.103	58.0764	2.00618	7980	2	2	0	13
367	304.933	362.117	364.123	128.059	2.00609	385141	1	1	1	18
368	305.579	408.159	410.165	174.1	2.00583	79528.6	1	1	1	35
369	305.84	317.132	319.138	83.0735	2.00655	16000	1	1	0	2
370	306.31	417.176	419.179	366.235	2.0031	6910	2	2	0	2
371	306.39	761.306	763.307	1054.5	2.00079	3180	2	2	0	0
372	306.392	593.333	595.341	359.274	2.0081	40933.3	1	1	0	0
373	306.757	466.162	468.171	232.103	2.00898	85727.8	1	1	2	22
374	306.91	724.146	728.165	257.037	4.01909	11900	1	2	0	13
375	308.62	413.164	415.168	358.21	2.00491	5270	2	2	0	23
376	309.63	591.316	595.331	124.207	4.01496	18500	1	2	0	0
377	309.69	358.042	360.048	123.984	2.00556	13966.4	1	1	0	6
378	310.559	441.158	443.165	207.1	2.00715	29977	1	1	1	11
379	310.65	337.153	339.16	103.095	2.00745	9170	1	1	0	0
380	312.365	500.185	502.19	266.126	2.00547	86750	1	1	0	14
381	312.39	277.108	279.117	86.0989	2.00893	8180	2	2	0	1
382	312.445	415.164	417.167	362.212	2.0029	5870	2	2	3	38
383	313.602	591.317	593.329	357.259	2.01158	81832	1	1	0	0
384	315.44	333.133	335.137	198.149	2.00429	13900	2	2	0	0
385	315.91	572.223	574.23	676.329	2.00725	4820	2	2	0	18
386	316.317	439.157	441.16	205.098	2.00375	10087.5	1	1	0	33
387	317.76	478.165	480.172	244.107	2.00654	89250	1	1	0	17
388	317.798	406.144	408.15	172.085	2.00631	137937	1	1	2	12
389	318.36	342.134	344.138	216.151	2.00461	7380	2	2	0	15
390	318.963	362.118	364.123	128.059	2.00576	141966	1	1	1	18
391	318.98	363.138	365.145	258.16	2.00633	8590	2	2	0	6
392	319.363	372.135	374.142	138.077	2.00703	15526.7	1	1	0	4
393	322.14	409.147	411.15	175.089	2.003	45700	1	1	1	41
394	322.15	307.113	309.117	73.0551	2.00382	29300	1	1	3	18
395	322.323	335.142	337.148	101.084	2.00628	52597.1	1	1	0	20
396	322.349	323.106	325.113	89.048	2.00641	1.74402e+07	1	1	4	38
397	323.12	449.178	451.18	430.239	2.00261	5140	2	2	0	2
398	323.463	480.169	482.176	246.11	2.0075	72883.3	1	1	0	13
399	325.36	279.08	281.086	45.0221	2.00583	292563	1	1	1	8
400	326.202	303.121	305.129	69.0623	2.00797	15218	1	1	0	2
401	326.23	647.258	649.259	826.399	2.00115	4020	2	2	0	0
402	326.933	323.265	325.272	89.207	2.00662	1196450	1	1	0	0
403	327.079	317.131	319.139	83.0732	2.00723	20977.6	1	1	0	2
404	327.16	455.172	457.178	221.114	2.00622	35891.7	1	1	0	3
405	327.384	480.18	482.185	246.121	2.00568	178201	1	1	2	20
406	327.48	465.18	467.185	231.122	2.00463	56300	1	1	0	7
407	327.52	304.128	306.133	140.14	2.00431	3990	2	2	0	0
408	328.494	450.169	452.175	216.111	2.00609	69118.2	1	1	0	16
409	328.68	307.12	309.124	73.0615	2.00416	38200	1	1	1	2
410	328.799	309.124	311.132	75.0661	2.00773	31888.2	1	1	2	13
411	328.947	416.167	418.175	364.217	2.0078	6580	2	2	0	1
412	329.033	396.112	398.118	162.053	2.00625	103383	1	1	5	82
413	329.703	422.174	424.181	188.116	2.00647	304714	1	1	3	25
414	330.581	351.139	353.147	117.081	2.00799	30326.7	1	1	5	38
415	330.96	309.121	311.129	75.0627	2.0083	9670	1	1	0	0
416	331.412	415.132	417.138	181.074	2.00554	157211	1	1	5	46
417	332.031	381.148	383.154	147.09	2.00603	107608	1	1	0	40
418	332.32	353.151	355.156	119.092	2.00558	15500	1	1	0	10
419	332.735	464.183	466.19	230.125	2.0071	22375	1	1	0	14
420	333.97	314.12	316.127	160.124	2.00649	17200	2	2	2	12
421	335.112	406.144	408.15	172.085	2.00631	352437	1	1	2	12
422	336.651	323.107	325.113	89.0484	2.00634	2.33865e+07	1	1	4	38
423	337.203	352.147	354.153	236.178	2.00539	6286.67	2	2	1	0
424	337.269	323.265	325.272	89.2068	2.00652	1.45408e+06	1	1	0	0
425	337.822	361.062	363.067	127.004	2.00468	14400	1	1	0	0
426	339.333	452.176	454.181	218.118	2.00547	14600	1	1	2	4
427	339.344	370.12	372.126	136.061	2.00628	67573.1	1	1	1	4
428	340.913	348.136	350.144	114.078	2.00776	152072	1	1	1	4
429	341.201	450.169	452.176	216.111	2.00639	130407	1	1	0	16
430	341.283	707.119	709.12	473.06	2.00085	25633.3	1	1	0	2
431	341.462	395.128	397.134	161.07	2.00545	47056	1	1	1	48
432	341.473	709.262	711.267	475.204	2.00454	42533.3	1	1	0	9
433	342.43	469.195	471.204	470.273	2.00945	7600	2	2	0	1
434	343.28	303.124	305.132	69.066	2.00736	4720	1	1	0	0
435	343.335	441.17	443.176	414.224	2.00579	6630	2	2	0	3
436	343.93	401.165	403.17	334.213	2.00522	9480	2	2	7	86
437	344.107	707.118	711.132	240.009	4.01375	23866.7	1	2	0	0
438	344.788	364.169	366.175	130.111	2.00637	513865	1	1	1	10
439	344.87	317.131	319.138	83.0729	2.00693	15158.3	1	1	0	2
440	344.915	278.122	280.127	88.1273	2.00523	7980	2	2	0	1
441	346.115	309.126	311.133	75.0679	2.00685	448662	1	1	2	13
442	346.16	711.133	713.138	477.074	2.00554	4630	1	1	0	6
443	346.48	334.135	336.141	200.153	2.00578	6110	2	2	0	1
444	346.953	753.325	755.325	519.267	1.99985	19700	1	1	0	2
445	348.92	431.172	433.176	394.228	2.00321	6290	2	2	0	8
446	349.584	479.195	481.201	245.137	2.00579	45379.4	1	1	0	11
447	349.791	408.159	410.165	174.1	2.00623	92946.4	1	1	1	35
448	349.851	337.122	339.128	103.064	2.00613	3.09471e+06	1	1	8	45
449	350.52	626.241	628.247	784.366	2.00612	4450	2	2	0	4
450	351.913	348.139	350.146	228.162	2.00648	6700	2	2	0	0
451	352.68	530.196	532.201	296.137	2.00527	61600	1	1	0	19
452	352.915	367.134	369.138	133.076	2.00449	30460	1	1	0	40
453	353.16	363.102	365.108	129.043	2.0065	1245750	1	1	5	28
454	353.163	485.219	487.226	251.16	2.00734	563000	1	1	0	2
455	353.19	371.257	373.266	137.199	2.00901	6295	1	1	0	0
456	353.203	463.237	465.243	229.179	2.00606	303549	1	1	0	2
457	354.03	453.17	455.177	219.111	2.00782	21400	1	1	2	19
458	354.49	676.264	678.267	884.411	2.00277	4960	2	2	0	2
459	355.141	422.174	424.18	188.116	2.00602	136503	1	1	3	25
460	355.37	381.115	383.118	147.056	2.00357	109000	1	1	6	55
461	355.6	386.097	388.101	152.038	2.00473	97000	1	1	3	9
462	356.803	323.125	325.132	89.0669	2.00646	71125	1	1	0	0
463	358.015	317.13	319.138	83.072	2.00748	12100	1	1	0	2
464	358.275	323.136	325.141	89.0775	2.00481	151000	1	1	0	0
465	359.069	429.148	431.153	195.089	2.00574	179338	1	1	0	31
466	359.615	329.097	331.104	95.0391	2.00649	20550	1	1	0	7
467	360.16	414.163	416.166	360.209	2.00361	5220	2	2	0	9
468	361.497	323.113	325.119	89.0543	2.00687	49170	1	1	0	1
469	361.57	345.102	347.109	111.044	2.00686	10900	1	1	1	10
470	361.656	351.138	353.143	117.079	2.00551	33782.7	1	1	5	38
471	362.4	446.175	448.178	424.233	2.00294	11600	2	2	0	13
472	362.972	452.184	454.191	218.125	2.00684	133942	1	1	0	7
473	363.37	480.181	482.186	246.122	2.00582	42500	1	1	2	20
474	363.5	656.253	658.262	844.389	2.00894	5570	2	2	0	0
475	363.683	350.143	352.149	232.169	2.00633	6703.33	2	2	0	5
476	364.2	416.167	418.173	364.217	2.00682	7120	2	2	0	0
477	364.23	588.23	590.238	708.344	2.00803	5560	2	2	0	1
478	365.255	304.121	306.129	140.125	2.00836	5296.67	2	2	0	5
479	365.84	308.125	310.132	148.132	2.00745	5130	2	2	0	4
480	365.945	459.205	461.212	225.147	2.00629	155857	1	1	0	1
481	366.135	265.104	267.111	62.0917	2.00728	4415	2	2	0	0
482	366.98	314.12	316.127	160.123	2.00716	20500	2	2	2	12
483	368.11	386.093	388.098	152.035	2.00564	173043	1	1	3	13
484	369.1	318.133	320.138	168.15	2.00485	5950	2	2	0	5
485	369.5	263.099	265.105	58.0819	2.00615	5030	2	2	0	13
486	369.55	512.153	514.159	278.095	2.00654	33400	1	1	0	27
487	370.45	395.132	397.138	161.074	2.00576	31300	1	1	1	48
488	370.627	438.169	440.176	204.111	2.00629	108520	1	1	0	12
489	373	795.165	797.171	561.107	2.00525	127000	1	1	0	1
490	373.56	428.138	430.145	194.079	2.00766	41400	1	1	1	33
491	373.604	317.132	319.139	83.0734	2.00727	18542.8	1	1	0	2
492	374.07	537.201	539.208	303.143	2.00668	26800	1	1	1	14
493	374.305	423.151	425.155	189.093	2.00361	43250	1	1	0	2
494	374.937	480.08	482.084	246.021	2.00488	53908.3	1	1	0	13
495	374.962	797.171	799.173	563.112	2.00263	22810	1	1	0	3
496	375.618	479.189	481.198	245.13	2.00946	28366.7	1	1	0	18
497	376.293	350.148	352.157	116.09	2.0083	125433	1	1	1	9
498	376.537	499.163	501.171	265.105	2.00766	79333.3	1	1	0	7
499	377.045	477.18	479.188	243.122	2.00816	110931	1	1	0	8
500	377.49	455.177	457.186	442.237	2.00912	5480	2	2	0	5
501	379.79	399.071	401.074	165.013	2.00325	14200	1	1	0	8
502	380.037	297.106	299.112	63.0476	2.00594	56101.5	1	1	0	0
503	380.48	443.164	445.172	209.105	2.00852	47868.4	1	1	0	18
504	380.536	303.116	305.123	69.0578	2.00654	106332	1	1	0	2
505	380.61	414.158	416.167	360.2	2.00818	8085	2	2	0	11
506	380.785	348.138	350.144	114.079	2.00643	4148125	1	1	1	4
507	381.066	409.143	411.149	175.085	2.00609	192758	1	1	1	41
508	383.002	303.118	305.126	69.0597	2.00792	13257.5	1	1	0	2
509	384.48	657.258	659.266	846.399	2.00834	3990	2	2	0	0
510	384.92	670.266	672.266	872.415	2.00004	4470	2	2	0	0
511	387.17	426.17	428.173	192.112	2.00296	27900	1	1	0	17
512	387.555	317.131	319.139	83.0726	2.00825	15081.3	1	1	0	2
513	388.5	324.126	326.131	180.135	2.00549	3950	2	2	0	0
514	389.559	395.163	397.169	161.105	2.00599	114681	1	1	2	14
515	389.87	366.101	368.107	132.043	2.00604	146009	1	1	7	69
516	391.5	529.207	531.209	590.297	2.00195	7160	2	2	0	5
517	391.61	405.157	407.164	342.198	2.00644	7770	2	2	0	1
518	391.72	409.143	411.149	175.085	2.00624	202571	1	1	1	41
519	392.308	363.101	365.107	129.043	2.00632	2798125	1	1	5	28
520	392.38	395.129	397.135	161.07	2.0066	361000	1	1	1	48
521	393.29	371.261	373.272	137.203	2.01041	11400	1	1	0	0
522	394.071	436.189	438.195	202.13	2.00605	59166.7	1	1	0	14
523	394.747	479.195	481.2	245.136	2.00568	45907.7	1	1	0	10
524	394.75	544.211	546.217	310.153	2.00538	100552	1	1	0	15
525	395.21	402.168	404.179	336.22	2.01052	6450	2	2	0	0
526	396.14	286.03	288.036	51.9715	2.00659	35900	1	1	0	1
527	396.379	351.135	353.143	117.077	2.00753	61955.8	1	1	5	38
528	397.17	467.174	469.177	233.116	2.00351	30700	1	1	0	6
529	397.31	295.107	297.114	61.0491	2.00702	4350	1	1	1	15
530	397.93	349.122	351.13	115.064	2.0083	210000	1	1	2	33
531	397.99	351.13	353.14	117.072	2.00979	37625	1	1	0	0
532	398.12	309.126	311.133	75.0682	2.0063	210880	1	1	2	13
533	398.68	820.325	822.333	1172.53	2.00769	3600	2	2	0	0
534	398.927	318.13	320.135	168.143	2.00565	6963.33	2	2	0	0
535	399.47	384.14	386.149	150.081	2.00965	25400	1	1	0	8
536	399.74	420.159	422.166	186.101	2.00657	298672	1	1	0	16
537	400.485	309.099	311.107	75.0409	2.00761	41700	1	1	0	2
538	401.621	493.211	495.216	259.152	2.00531	40969.2	1	1	1	4
539	401.86	304.123	306.131	140.129	2.00787	4825	2	2	0	0
540	402.193	471.31	473.32	237.252	2.01045	15466.9	1	1	0	0
541	402.578	309.092	311.1	75.0338	2.00801	48000	1	1	1	21
542	403.087	453.299	455.307	219.241	2.00788	6882.5	1	1	0	1
543	403.18	323.132	325.14	89.0742	2.00745	18200	1	1	0	0
544	403.54	683.262	685.264	898.406	2.00263	3900	2	2	0	1
545	403.566	480.18	482.186	246.122	2.00604	129539	1	1	2	20
546	403.91	345.136	347.143	222.155	2.00716	4860	2	2	0	1
547	404.029	335.107	337.114	101.049	2.00666	83116.7	1	1	0	29
548	404.18	382.134	384.14	148.076	2.00522	22200	1	1	2	46
549	404.35	425.303	427.311	191.244	2.00842	4760	1	1	0	0
550	406.035	321.107	323.113	87.0485	2.00605	37350	1	1	0	1
551	406.478	395.132	397.137	161.073	2.00521	55775	1	1	1	48
552	406.897	452.185	454.19	218.126	2.00575	81449	1	1	0	7
553	406.98	648.253	650.256	828.389	2.00325	4510	2	2	0	0
554	407.65	701.274	703.279	934.431	2.00514	4150	2	2	0	0
555	408.018	422.173	424.18	188.115	2.007	85757.1	1	1	3	24
556	408.31	673.263	675.269	878.41	2.00602	3500	2	2	0	0
557	408.62	531.202	533.207	594.287	2.00526	6680	2	2	0	1
558	409.975	307.113	309.117	73.0545	2.00463	56050	1	1	3	18
559	410.11	754.3	756.301	1040.48	2.00115	5040	2	2	0	0
560	410.34	587.234	589.235	706.35	2.00128	5430	2	2	0	1
561	410.93	348.143	350.146	228.169	2.00368	6420	2	2	0	6
562	411.193	317.131	319.138	83.0724	2.00721	11733.3	1	1	0	2
563	411.93	318.126	320.132	168.135	2.00633	5070	2	2	0	0
564	412.23	651.257	653.258	834.397	2.00095	7190	2	2	0	0
565	412.62	445.189	447.194	211.131	2.00528	40500	1	1	0	1
566	412.65	522.206	524.212	576.294	2.00599	8360	2	2	0	6
567	412.85	303.12	305.127	69.0618	2.00662	11245.6	1	1	0	2
568	413.02	343.227	345.237	109.169	2.00946	5400	1	1	0	0
569	414.17	414.161	416.166	360.205	2.00521	4860	2	2	0	11
570	414.27	536.207	538.217	604.297	2.00962	5150	2	2	0	7
571	415.05	436.188	438.195	202.13	2.00715	32000	1	1	0	14
572	415.141	574.232	576.238	340.174	2.00548	56370.6	1	1	1	4
573	415.5	596.216	598.222	362.158	2.00552	46250	1	1	0	8
574	416.32	297.036	299.04	62.9781	2.00396	4340	1	1	0	0
575	416.614	363.101	365.107	129.043	2.00633	5.55138e+06	1	1	5	28
576	417.204	323.138	325.145	89.08	2.00719	15420	1	1	0	13
577	417.405	461.173	463.183	227.114	2.01074	36500	1	1	0	5
578	417.746	385.104	387.112	151.045	2.00786	314214	1	1	3	20
579	418.329	452.184	454.191	218.126	2.00645	70590	1	1	0	7
580	418.39	669.246	671.248	435.188	2.00174	14464	1	1	0	11
581	418.416	459.159	461.167	225.1	2.00787	111582	1	1	0	19
582	418.608	667.24	669.245	433.182	2.00459	88223.1	1	1	0	0
583	418.612	689.222	691.228	455.164	2.00557	83194.7	1	1	0	12
584	420.123	351.138	353.144	117.08	2.00604	1.49152e+07	1	1	5	38
585	420.348	351.301	353.308	117.243	2.00622	950311	1	1	0	0
586	422.445	265.101	267.107	31.0423	2.00615	3351250	1	1	1	7
587	423.137	378.184	380.191	144.126	2.0064	291323	1	1	2	9
588	423.357	299.139	301.146	65.0804	2.00683	11680	1	1	0	0
589	423.49	453.17	455.175	219.111	2.00559	71125	1	1	2	19
590	424.875	310.075	312.081	76.0163	2.00593	89800	1	1	1	16
591	425.495	494.195	496.201	260.137	2.00634	110687	1	1	2	13
592	426.005	417.273	419.276	183.215	2.0031	20650	1	1	0	0
593	427.88	298.121	300.13	128.125	2.00874	2880	2	2	0	0
594	428.261	371.257	373.265	137.199	2.00807	4570	1	1	0	0
595	429.003	317.132	319.139	83.0738	2.00731	38105.8	1	1	0	2
596	429.395	460.118	462.125	226.06	2.00739	163500	1	1	1	29
597	430.51	831.328	833.331	1194.54	2.00361	2860	2	2	0	1
598	430.947	479.196	481.2	245.138	2.00418	34385.7	1	1	0	11
599	431.222	386.092	388.098	152.034	2.00618	2.7857e+06	1	1	3	13
600	432.86	537.206	539.209	303.148	2.00326	24266.7	1	1	1	14
601	433.02	544.206	546.209	620.295	2.00281	8060	2	2	0	9
602	433.293	398.149	400.157	164.091	2.00791	48928.6	1	1	1	10
603	434.684	452.184	454.19	218.125	2.00654	65474.6	1	1	0	7
604	435.154	275.543	277.55	41.4848	2.00694	7922	1	1	0	0
605	435.465	255.03	257.036	41.9433	2.00616	5120	2	2	0	0
606	436.2	441.116	443.121	207.058	2.00478	26200	1	1	1	41
607	436.522	337.123	339.129	103.065	2.00619	1.19587e+06	1	1	8	45
608	436.522	400.165	402.171	166.106	2.00685	64081.8	1	1	0	5
609	438.17	575.224	577.233	682.331	2.00949	3880	2	2	0	0
610	438.29	660.265	662.27	852.413	2.00463	4190	2	2	0	0
611	439.032	420.161	422.166	186.102	2.00494	64126	1	1	0	16
612	439.438	303.118	305.127	69.0592	2.00907	11580	1	1	0	2
613	440.11	420.169	422.172	186.111	2.00309	110000	1	1	0	4
614	440.18	318.132	320.138	168.148	2.00592	6000	2	2	0	5
615	440.345	424.052	426.056	189.994	2.00416	26160	1	1	0	3
616	440.61	390.148	392.152	156.089	2.00446	33900	1	1	0	7
617	441.04	589.231	591.238	710.345	2.00731	5500	2	2	0	0
618	441.098	465.172	467.18	231.114	2.00742	40668.4	1	1	2	13
619	441.947	480.181	482.186	246.123	2.00437	79600	1	1	2	20
620	442.036	366.101	368.107	132.043	2.00563	80256.5	1	1	7	69
621	442.693	321.128	323.133	87.0695	2.00469	118283	1	1	1	29
622	442.975	458.176	460.181	448.236	2.00442	6447.5	2	2	0	1
623	443.5	625.242	627.243	782.368	2.00075	4630	2	2	0	1
624	443.653	429.164	431.172	390.211	2.00873	7030	2	2	0	2
625	443.785	317.131	319.139	83.0722	2.00822	12900	1	1	0	2
626	444.897	545.241	547.247	311.183	2.00549	40825	1	1	0	1
627	444.98	415.319	417.327	181.26	2.00802	2850	1	1	0	0
628	445.55	428.168	430.178	388.219	2.0107	6470	2	2	0	0
629	446.51	532.2	534.21	596.284	2.00997	5550	2	2	0	7
630	447.19	633.251	635.257	798.385	2.00676	4330	2	2	0	7
631	447.307	339.134	341.143	105.076	2.00915	9436.67	1	1	1	15
632	449	607.239	609.249	746.361	2.00978	5770	2	2	0	0
633	449.02	626.228	628.234	392.17	2.00576	36600	1	1	0	10
634	449.5	537.205	539.206	303.146	2.0014	38900	1	1	1	14
635	450.06	522.197	524.206	576.278	2.00841	6070	2	2	0	5
636	450.174	440.133	442.139	206.075	2.00559	47500	1	1	0	39
637	450.422	448.19	450.195	214.131	2.00537	95220	1	1	1	7
638	450.691	339.138	341.143	105.08	2.00492	16896.1	1	1	1	14
639	450.87	688.259	690.271	908.402	2.01132	4460	2	2	0	0
640	451.05	632.245	634.251	796.373	2.00659	3700	2	2	0	0
641	452.15	296.119	298.124	124.121	2.00515	2780	2	2	0	1
642	452.368	393.15	395.154	159.092	2.00362	30840	1	1	6	43
643	452.44	427.177	429.184	193.119	2.00731	11000	1	1	0	14
644	452.5	565.232	567.237	331.174	2.00514	40700	1	1	0	5
645	452.64	507.205	509.212	546.292	2.00731	7880	2	2	0	18
646	453.03	362.131	364.135	256.145	2.0042	8500	2	2	0	8
647	453.608	535.222	537.226	301.164	2.00381	62797	1	1	0	9
648	454.14	465.178	467.182	462.24	2.00391	8290	2	2	0	15
649	454.154	422.174	424.18	188.116	2.00618	174638	1	1	3	25
650	455.72	657.256	659.261	846.394	2.00542	3820	2	2	0	0
651	456.02	534.208	536.213	600.299	2.00542	5880	2	2	0	3
652	456.479	408.159	410.165	174.101	2.00591	228317	1	1	1	35
653	456.956	512.185	514.191	278.126	2.00609	32454.5	1	1	3	20
654	457.56	433.163	435.171	398.208	2.00872	9070	2	2	0	10
655	457.634	367.123	369.128	133.064	2.00562	174100	1	1	0	0
656	458.015	611.236	613.245	754.356	2.00895	5425	2	2	0	2
657	458.144	379.132	381.14	145.074	2.00755	35172.7	1	1	6	54
658	459.445	317.131	319.14	83.0726	2.00864	21426.3	1	1	0	2
659	460.235	279.114	281.121	45.0553	2.0072	5840	1	1	1	12
660	460.537	558.227	560.233	324.168	2.00607	222911	1	1	2	20
661	460.64	524.206	526.208	580.295	2.00252	5785	2	2	0	19
662	461.44	763.315	765.317	1058.51	2.00262	3350	2	2	0	2
663	461.715	466.2	468.206	232.142	2.00588	156180	1	1	0	10
664	463.6	335.14	337.146	101.082	2.00532	6090	1	1	0	20
665	463.85	572.221	574.226	676.326	2.00465	3460	2	2	0	1
666	463.948	551.217	553.224	317.159	2.00672	28285	1	1	0	13
667	463.957	494.195	496.201	260.137	2.00583	185761	1	1	2	13
668	464.05	413.266	415.273	179.208	2.00666	8180	1	1	0	0
669	464.447	420.16	422.166	186.102	2.00575	44370	1	1	0	16
670	464.88	617.234	619.235	766.352	2.00092	3650	2	2	0	2
671	465.02	505.194	507.199	542.272	2.00525	6230	2	2	1	8
672	465.873	422.173	424.18	188.115	2.00681	142667	1	1	3	25
673	467.5	565.232	567.237	331.173	2.00529	37900	1	1	0	4
674	468.3	657.263	659.271	846.409	2.00788	3210	2	2	0	0
675	469.065	339.136	341.143	105.077	2.00718	52795	1	1	1	15
676	469.167	337.129	339.135	103.07	2.00618	81000	1	1	0	0
677	469.31	692.27	694.271	916.422	2.00123	5220	2	2	0	0
678	469.56	336.136	338.144	204.154	2.00819	5810	2	2	0	3
679	470.019	409.179	411.185	175.121	2.00614	248662	1	1	0	19
680	470.65	544.213	546.218	310.154	2.00514	55850	1	1	0	13
681	471.492	431.142	433.149	197.084	2.00643	202423	1	1	0	28
682	471.735	696.275	698.279	924.434	2.00414	4230	2	2	0	2
683	471.798	290.116	292.121	112.115	2.00565	6098	2	2	0	0
684	471.83	554.226	556.231	640.335	2.00527	5140	2	2	0	1
685	471.87	295.117	297.123	122.117	2.00588	3352.5	2	2	0	1
686	472.36	428.161	430.172	388.206	2.01033	5360	2	2	0	3
687	472.7	487.313	489.316	253.255	2.003	10000	1	1	0	0
688	473.174	449.169	451.178	430.222	2.0086	8504	2	2	0	0
689	474.217	321.127	323.133	87.0685	2.00635	2440000	1	1	1	29
690	474.445	579.246	581.253	345.188	2.00623	21590	1	1	0	2
691	474.55	630.243	632.254	792.37	2.0107	5810	2	2	0	7
692	475.451	353.244	355.25	119.186	2.00554	40542.9	1	1	0	0
693	475.5	541.207	543.214	614.298	2.00706	7300	2	2	0	6
694	475.681	423.159	425.165	189.101	2.00597	38657.1	1	1	0	30
695	476.55	335.128	337.137	101.07	2.00847	9105	1	1	0	0
696	476.575	487.305	489.31	253.247	2.005	11365	1	1	0	0
697	477.24	573.232	575.237	678.348	2.00433	5570	2	2	0	17
698	477.33	502.187	504.191	536.258	2.00346	5110	2	2	0	3
699	478.39	628.237	630.239	788.357	2.00262	3640	2	2	0	0
700	478.659	335.132	337.139	101.074	2.00719	14290.9	1	1	0	0
701	478.7	268.109	270.116	68.1009	2.00697	5310	2	2	0	0
702	478.95	333.127	335.133	99.0691	2.00522	21700	1	1	1	13
703	479.2	550.211	552.215	632.305	2.00448	6400	2	2	0	3
704	479.21	335.136	337.14	101.078	2.00377	5810	1	1	0	0
705	479.464	452.185	454.19	218.127	2.0056	65334.8	1	1	0	7
706	479.561	448.189	450.195	214.131	2.00546	54253.9	1	1	1	7
707	480.05	366.102	368.111	132.044	2.00873	17200	1	1	7	69
708	480.185	694.05	696.056	459.992	2.00589	6785	1	1	0	0
709	480.277	493.211	495.217	259.153	2.00571	78633.3	1	1	1	4
710	481	429.164	431.169	390.211	2.00551	5360	2	2	0	2
711	481.062	370.097	372.104	136.039	2.00634	1.33567e+06	1	1	3	24
712	481.238	494.195	496.201	260.137	2.00516	52875	1	1	2	13
713	481.3	500.19	502.195	532.263	2.00458	5866.67	2	2	0	3
714	484.52	698.276	700.283	928.435	2.00777	3580	2	2	0	0
715	484.57	619.24	621.253	770.364	2.01273	6680	2	2	0	0
716	485.06	610.237	612.242	752.357	2.00541	5920	2	2	0	0
717	485.12	513.192	515.202	558.267	2.0105	5650	2	2	0	2
718	485.51	506.19	508.2	544.264	2.0098	6090	2	2	0	4
719	485.651	536.21	538.214	604.302	2.00496	6834.29	2	2	0	2
720	485.86	524.193	526.198	580.268	2.00499	4000	2	2	0	11
721	485.997	409.144	411.152	175.086	2.00759	31915.8	1	1	1	41
722	486.03	643.25	645.255	818.384	2.00471	4630	2	2	0	1
723	486.165	446.175	448.181	212.116	2.00621	44145.5	1	1	1	3
724	486.34	522.191	524.197	576.265	2.00653	4790	2	2	0	16
725	486.51	533.205	535.21	598.294	2.00527	6080	2	2	0	3
726	486.79	456.171	458.177	444.225	2.00652	7050	2	2	0	7
727	486.95	524.2	526.208	580.283	2.0087	5230	2	2	0	4
728	487.48	405.142	407.151	342.168	2.0089	10800	2	2	0	3
729	487.52	405.149	407.154	342.182	2.00421	11165	2	2	0	11
730	488.07	277.108	279.114	86.0989	2.00611	7230	2	2	0	1
731	488.95	625.241	627.246	782.366	2.0045	5550	2	2	0	0
732	489.45	574.214	576.226	680.312	2.01192	6260	2	2	0	1
733	489.57	400.163	402.166	332.21	2.00287	5760	2	2	0	3
734	489.58	422.164	424.167	376.21	2.00344	3390	2	2	0	3
735	490.01	411.151	413.156	177.093	2.00561	13527.1	1	1	0	4
736	490.69	599.23	601.231	730.343	2.00113	5660	2	2	0	0
737	490.702	364.168	366.174	130.11	2.00565	102618	1	1	1	10
738	491.02	480.179	482.182	246.121	2.00269	37100	1	1	2	20
739	491.272	536.204	538.21	604.291	2.00587	6643.12	2	2	0	11
740	491.913	393.148	395.153	159.089	2.00526	89158.7	1	1	6	43
741	492.64	538.209	540.211	608.301	2.00185	6030	2	2	0	2
742	493.642	349.122	351.128	115.064	2.00632	1.3635e+07	1	1	2	33
743	493.68	277.105	279.111	43.0462	2.00675	9340	1	1	0	4
744	493.757	349.283	351.291	115.225	2.00844	1.00269e+06	1	1	0	0
745	494.016	466.2	468.206	232.142	2.00625	97000	1	1	0	10
746	494.245	371.104	373.11	137.045	2.00648	273500	1	1	5	16
747	496.737	680.071	682.076	446.012	2.00493	21080.3	1	1	0	5
748	497.05	431.166	433.169	394.214	2.00383	6530	2	2	0	9
749	497.523	546.206	548.212	624.295	2.00661	4966.67	2	2	0	0
750	498.257	362.153	364.159	128.095	2.00631	195084	1	1	0	8
751	498.27	429.16	431.163	390.202	2.00375	6260	2	2	0	15
752	498.31	648.26	650.262	828.403	2.00241	3960	2	2	0	0
753	498.71	384.137	386.141	150.079	2.00376	56400	1	1	0	8
754	498.74	512.197	514.199	556.277	2.00177	3910	2	2	0	11
755	498.967	317.131	319.139	83.0724	2.00819	12310	1	1	0	2
756	499.44	430.171	432.175	392.225	2.00398	10300	2	2	0	0
757	499.71	704.265	706.275	940.414	2.00957	4050	2	2	0	2
758	499.957	682.075	684.078	448.017	2.00279	4592.17	1	1	0	0
759	500.02	456.159	458.165	222.101	2.00574	47600	1	1	0	24
760	500.04	491.182	493.191	514.246	2.00967	8030	2	2	0	0
761	500.53	548.214	550.22	628.312	2.00548	6990	2	2	0	17
762	501.02	605.235	607.244	742.353	2.00961	4270	2	2	0	2
763	501.021	422.177	424.18	188.118	2.00381	127253	1	1	3	25
764	501.37	542.215	544.216	616.313	2.00163	7130	2	2	0	3
765	501.555	428.166	430.173	388.215	2.00768	6135	2	2	0	0
766	502.16	405.158	407.164	342.199	2.00638	8070	2	2	0	1
767	502.93	414.044	416.047	179.985	2.00312	5390	1	1	0	2
768	503.16	516.187	518.198	564.257	2.01109	6870	2	2	0	2
769	503.17	543.2	545.203	618.284	2.00278	5690	2	2	0	4
770	503.26	459.31	461.316	225.252	2.00574	16500	1	1	0	0
771	503.65	515.199	517.201	562.281	2.00164	6800	2	2	0	4
772	503.87	485.176	487.178	502.235	2.00198	6340	2	2	0	4
773	503.895	450.204	452.21	216.146	2.00594	63461.6	1	1	0	15
774	504.209	471.309	473.316	237.25	2.00698	11718.3	1	1	0	0
775	504.265	606.237	608.24	744.358	2.0028	5530	2	2	0	2
776	504.35	528.181	530.188	294.123	2.00659	49900	1	1	2	14
777	505.18	433.155	435.165	398.193	2.00976	6790	2	2	0	14
778	506.087	466.146	468.153	232.088	2.00694	25600	1	1	0	19
779	506.37	292.118	294.123	116.119	2.00506	2630	2	2	0	12
780	506.37	580.218	582.23	692.319	2.01234	4200	2	2	0	4
781	506.48	550.203	552.207	632.289	2.00383	7653.33	2	2	0	5
782	506.498	452.186	454.191	218.128	2.00414	101382	1	1	0	7
783	506.72	613.234	615.236	758.351	2.00248	4110	2	2	0	4
784	506.813	492.19	494.196	516.263	2.00656	6130	2	2	0	1
785	507.14	497.187	499.193	526.257	2.00599	7400	2	2	0	2
786	507.19	572.22	574.23	676.324	2.00988	4840	2	2	0	1
787	508.02	406.148	408.153	172.09	2.00452	30400	1	1	0	3
788	508.626	436.189	438.195	202.131	2.00583	64536.4	1	1	0	14
789	508.657	365.153	367.16	131.095	2.00648	891255	1	1	6	36
790	508.925	335.141	337.148	101.083	2.00698	35097.5	1	1	0	20
791	508.95	275.1	277.106	82.0827	2.00653	4845	2	2	0	0
792	509.33	345.136	347.146	222.155	2.00959	4460	2	2	0	1
793	509.68	618.246	620.25	768.376	2.0037	6450	2	2	0	5
794	509.725	479.18	481.187	490.244	2.00655	8475	2	2	0	1
795	509.8	289.109	291.114	110.102	2.00487	3640	2	2	0	0
796	510.4	517.199	519.204	566.281	2.00547	6223.33	2	2	0	5
797	510.535	548.207	550.211	628.297	2.00424	6630	2	2	0	5
798	510.57	428.159	430.17	388.202	2.01048	4920	2	2	0	5
799	511.775	680.071	682.076	446.012	2.0054	15566.9	1	1	0	5
800	512.103	442.168	444.174	416.22	2.00547	7800	2	2	0	3
801	512.507	449.17	451.179	430.224	2.00883	8750	2	2	0	0
802	513.475	402.158	404.163	336.2	2.00498	5635	2	2	0	2
803	513.696	398.152	400.159	164.094	2.0065	52200	1	1	1	10
804	513.742	570.217	572.224	672.317	2.00709	7260	2	2	0	5
805	513.85	682.075	684.078	448.017	2.0028	3861.25	1	1	0	0
806	514.54	446.164	448.17	424.212	2.00599	9900	2	2	0	3
807	514.877	416.162	418.168	364.208	2.00514	4923.33	2	2	0	1
808	516.35	468.17	470.177	234.111	2.0076	42464.8	1	1	0	11
809	516.537	435.17	437.175	402.223	2.00534	7266.67	2	2	0	5
810	517.02	613.227	615.24	758.338	2.01279	5880	2	2	0	4
811	517.135	550.21	552.217	632.303	2.00663	6320	2	2	0	2
812	517.49	457.107	459.113	223.049	2.00615	184623	1	1	1	41
813	517.7	376.131	378.136	284.145	2.00472	6780	2	2	1	11
814	518.268	471.174	473.18	474.231	2.00578	8297.5	2	2	0	2
815	518.65	617.245	619.248	766.373	2.00309	4220	2	2	0	1
816	518.89	606.228	608.232	744.339	2.00364	8140	2	2	0	4
817	518.9	541.209	543.211	614.301	2.00268	8150	2	2	0	6
818	519.05	503.191	505.193	538.264	2.00232	7110	2	2	0	6
819	519.085	520.198	522.204	572.279	2.00606	6510	2	2	0	4
820	519.305	362.145	364.149	256.173	2.0039	6075	2	2	0	0
821	519.45	562.217	564.219	656.317	2.00213	8600	2	2	0	1
822	520.85	517.307	519.312	283.249	2.00447	48300	1	1	0	2
823	520.91	295.118	297.126	122.12	2.00738	2860	2	2	0	1
824	520.955	407.162	409.168	173.103	2.00698	26275	1	1	4	29
825	521.36	374.138	376.145	280.159	2.00739	7630	2	2	0	2
826	521.56	523.207	525.209	578.297	2.00207	6140	2	2	0	1
827	521.99	332.134	334.139	196.151	2.00553	4450	2	2	0	7
828	522.068	462.205	464.209	228.146	2.00469	41350	1	1	2	3
829	522.58	442.165	444.171	416.213	2.00557	8690	2	2	0	2
830	522.836	335.142	337.148	101.083	2.00639	367776	1	1	0	20
831	522.865	716.277	718.285	964.438	2.00754	3275	2	2	0	0
832	523.307	353.148	355.157	119.09	2.00947	48702.5	1	1	0	10
833	523.375	527.197	529.205	586.276	2.00804	6882.5	2	2	0	9
834	523.84	692.271	694.279	916.426	2.00837	4555	2	2	0	0
835	523.905	321.127	323.133	87.0686	2.0063	707937	1	1	1	29
836	524.26	688.271	690.276	908.425	2.00459	3755	2	2	0	1
837	524.44	522.194	524.202	576.271	2.00764	7220	2	2	0	12
838	524.55	379.148	381.154	290.18	2.00581	6510	2	2	0	3
839	525.525	393.141	395.147	318.165	2.00595	23400	2	2	0	3
840	525.58	377.147	379.154	286.177	2.00694	4960	2	2	0	7
841	525.658	393.639	395.645	159.58	2.00655	8718.33	1	1	0	0
842	525.678	478.167	480.17	244.109	2.00351	46620	1	1	0	17
843	525.725	541.198	543.205	614.28	2.00664	7037.5	2	2	0	3
844	525.74	473.178	475.187	478.24	2.00859	6670	2	2	0	4
845	526.092	564.213	566.221	660.31	2.00807	5538	2	2	0	7
846	526.66	360.137	362.144	126.079	2.0069	19500	1	1	0	3
847	526.753	428.163	430.17	388.209	2.00748	7055	2	2	0	0
848	526.79	409.132	411.137	175.073	2.00529	116438	1	1	0	1
849	527.006	450.205	452.211	216.146	2.00608	70920	1	1	0	15
850	527.01	544.206	546.211	620.296	2.00457	5480	2	2	0	9
851	527.391	387.148	389.155	153.09	2.0065	399730	1	1	0	14
852	527.56	380.152	382.157	292.186	2.00517	6520	2	2	0	3
853	528.04	559.213	561.215	650.309	2.00199	5580	2	2	0	24
854	528.05	455.314	457.321	221.255	2.00711	16370	1	1	0	0
855	528.07	313.215	315.224	79.1569	2.00835	3580	1	1	0	0
856	528.5	502.19	504.196	536.263	2.00587	5090	2	2	0	4
857	528.54	728.279	730.284	988.442	2.00478	3910	2	2	0	0
858	529.282	524.197	526.205	580.278	2.00737	5331.67	2	2	0	5
859	529.31	708.282	710.29	948.448	2.00745	3880	2	2	0	0
860	529.35	720.282	722.288	972.447	2.0063	4620	2	2	0	0
861	529.46	568.219	570.22	668.321	2.00156	6480	2	2	0	3
862	529.53	737.292	739.293	1006.47	2.00089	7190	2	2	0	0
863	529.58	423.17	425.175	378.223	2.00528	6360	2	2	0	4
864	529.72	299.202	301.211	65.1439	2.00874	4200	1	1	0	0
865	529.96	761.288	763.299	1054.46	2.01101	3820	2	2	0	1
866	529.99	563.214	565.223	658.312	2.00863	5265	2	2	0	2
867	530.13	670.265	672.268	872.413	2.00262	4590	2	2	0	0
868	530.26	529.198	531.21	590.28	2.0113	7230	2	2	0	10
869	530.34	460.177	462.184	452.237	2.00751	6630	2	2	0	11
870	530.39	343.262	345.271	109.204	2.00909	14900	1	1	0	0
871	530.654	466.199	468.206	232.141	2.00661	94895.5	1	1	0	9
872	530.71	542.197	544.206	616.278	2.00896	6520	2	2	0	3
873	530.96	584.218	586.225	700.319	2.00684	7460	2	2	0	2
874	531.03	744.293	746.293	1020.47	2.00048	4650	2	2	0	12
875	531.13	647.265	649.267	826.414	2.00182	6050	2	2	0	2
876	531.39	405.095	407.099	171.037	2.00432	56400	1	1	0	3
877	531.668	578.216	580.224	688.315	2.00774	6527.5	2	2	0	8
878	532.141	370.097	372.103	136.039	2.00606	330312	1	1	3	24
879	532.31	539.209	541.211	610.302	2.00147	4510	2	2	0	7
880	532.837	306.134	308.141	72.0761	2.00641	29900	1	1	0	0
881	534.085	443.165	445.171	418.213	2.00579	9080	2	2	0	6
882	534.49	357.126	359.131	123.067	2.00498	34311.2	1	1	0	10
883	535.1	709.12	711.133	475.061	2.01302	21100	1	1	0	6
884	535.19	694.267	696.274	920.417	2.00771	4090	2	2	0	0
885	535.23	317.131	319.138	83.0732	2.0068	14100	1	1	0	2
886	535.27	449.18	451.19	430.243	2.01032	11300	2	2	0	22
887	535.427	383.109	385.116	149.051	2.00603	7.79845e+06	1	1	2	25
888	535.647	494.195	496.201	260.137	2.0056	65347.7	1	1	2	13
889	536.39	434.163	436.167	400.21	2.00382	4860	2	2	0	7
890	536.45	422.15	424.159	376.183	2.00918	6790	2	2	0	5
891	536.894	440.128	442.134	206.069	2.0062	182767	1	1	0	32
892	537.19	491.188	493.193	514.259	2.00572	4810	2	2	0	7
893	537.35	583.222	585.226	698.327	2.00377	7196.67	2	2	0	3
894	537.673	707.12	709.121	473.061	2.00129	10010	1	1	0	2
895	538.565	379.144	381.148	290.172	2.00428	5415	2	2	0	7
896	538.59	707.121	711.131	240.012	4.01015	11900	1	2	0	0
897	539.4	290.114	292.12	112.111	2.00645	4375	2	2	0	0
898	539.587	351.138	353.144	117.079	2.00637	1.59788e+07	1	1	5	38
899	539.961	351.301	353.307	117.243	2.00603	992957	1	1	0	0
900	540.487	337.12	339.125	103.062	2.005	92047.3	1	1	8	45
901	540.765	548.199	550.204	628.281	2.00539	7440	2	2	0	3
902	540.845	303.08	305.088	69.0218	2.00735	629557	1	1	0	3
903	540.87	346.086	348.092	112.028	2.00621	9826250	1	1	1	11
904	541.09	389.095	391.102	155.037	2.00626	19400	1	1	0	10
905	541.131	282.123	284.13	48.0652	2.00668	83858.6	1	1	0	1
906	542	395.103	397.111	161.044	2.00834	15000	1	1	3	17
907	542.7	603.234	605.236	738.351	2.00157	4485	2	2	0	1
908	543.29	424.152	426.163	380.187	2.01092	5390	2	2	0	3
909	544.03	528.18	530.186	294.122	2.00607	43900	1	1	2	15
910	544.43	467.176	469.179	466.235	2.0035	7810	2	2	1	2
911	545.33	430.167	432.175	392.218	2.00783	5440	2	2	0	26
912	545.54	488.176	490.18	508.235	2.00401	5400	2	2	0	9
913	545.844	395.107	397.112	161.049	2.0045	88903.6	1	1	3	19
914	545.946	457.108	459.113	223.05	2.0055	425712	1	1	1	41
915	545.97	501.189	503.196	534.261	2.0072	5840	2	2	0	10
916	546.03	443.169	445.173	418.222	2.00379	6830	2	2	0	1
917	546.43	466.171	468.181	464.226	2.00952	4900	2	2	0	1
918	546.5	530.058	532.06	295.999	2.00215	11700	1	1	0	0
919	547.145	405.15	407.157	342.183	2.00731	8525	2	2	0	11
920	547.175	464.172	466.177	460.227	2.00526	6145	2	2	0	7
921	547.552	436.19	438.196	202.131	2.00598	79166.3	1	1	0	14
922	547.9	564.22	566.231	660.323	2.011	5310	2	2	0	3
923	547.947	516.194	518.202	564.272	2.00725	6450	2	2	0	6
924	548.1	665.262	667.269	862.408	2.00654	3940	2	2	0	0
925	548.17	275.103	277.109	82.0893	2.0065	3760	2	2	0	0
926	548.34	470.17	472.178	472.224	2.00781	9440	2	2	0	5
927	548.485	517.2	519.205	566.283	2.00507	4926.67	2	2	0	7
928	548.54	532.203	534.208	596.29	2.0044	8430	2	2	0	5
929	548.715	562.213	564.219	656.31	2.00611	7325	2	2	0	0
930	549.188	498.182	500.19	528.248	2.00784	7200	2	2	0	11
931	549.625	317.599	319.607	83.5405	2.00786	18600	1	1	0	0
932	550.01	661.257	663.259	854.398	2.00152	3450	2	2	0	0
933	550.071	365.117	367.122	131.059	2.00466	63582	1	1	8	60
934	550.266	401.144	403.15	334.171	2.00587	6170	2	2	1	3
935	550.54	555.211	557.216	642.306	2.005	9700	2	2	0	5
936	550.845	560.21	562.216	652.304	2.00552	5555	2	2	0	1
937	550.89	622.247	624.249	776.377	2.00247	4170	2	2	0	1
938	551.34	672.264	674.269	876.412	2.00433	5310	2	2	0	0
939	551.594	521.241	523.248	287.183	2.00652	46580	1	1	0	0
940	551.71	489.183	491.185	510.249	2.00208	7380	2	2	0	14
941	551.81	761.3	763.306	1054.48	2.0068	2700	2	2	0	2
942	552	629.237	631.238	790.358	2.00046	4920	2	2	0	20
943	552.27	335.142	337.148	101.084	2.00603	142033	1	1	0	20
944	552.33	778.32	780.319	1088.52	1.9995	2630	2	2	0	0
945	552.345	387.252	389.261	153.194	2.00903	4385	1	1	0	0
946	553.55	518.195	520.204	568.273	2.00919	7450	2	2	0	3
947	554.22	736.291	738.293	1004.46	2.00278	3410	2	2	0	0
948	554.47	518.188	520.199	568.259	2.01083	5360	2	2	0	4
949	554.56	610.233	612.237	752.35	2.0033	9600	2	2	0	2
950	554.59	552.204	554.215	636.292	2.01033	4830	2	2	0	2
951	555.525	532.192	534.198	596.267	2.00633	5288.33	2	2	0	3
952	555.88	479.178	481.181	490.239	2.00384	7570	2	2	0	3
953	556.06	291.115	293.122	114.114	2.00664	3630	2	2	0	1
954	556.442	503.188	505.195	538.259	2.00672	7107.5	2	2	0	10
955	557.312	466.2	468.206	232.142	2.00611	108462	1	1	0	10
956	557.84	568.206	570.213	668.295	2.00733	7013.33	2	2	0	0
957	558.19	492.184	494.191	516.252	2.00682	7020	2	2	0	1
958	558.57	390.147	392.154	312.178	2.00632	6140	2	2	0	4
959	558.701	379.132	381.139	290.147	2.00702	4635.71	2	2	0	14
960	559.21	477.168	479.175	486.22	2.00728	5590	2	2	0	8
961	559.302	279.117	281.122	45.0583	2.00575	255779	1	1	1	12
962	559.535	377.127	379.132	286.136	2.00587	14166.4	2	2	0	1
963	559.612	431.155	433.163	394.192	2.00857	7825	2	2	0	18
964	559.64	407.163	409.168	173.105	2.00523	75400	1	1	4	29
965	559.93	412.164	414.168	356.212	2.00408	5910	2	2	0	1
966	560.08	443.163	445.171	418.21	2.00737	5020	2	2	0	8
967	560.72	486.169	488.174	504.221	2.00525	10540	2	2	0	5
968	560.788	362.152	364.159	128.094	2.00748	378505	1	1	0	8
969	560.97	534.197	536.205	600.278	2.00742	4585	2	2	0	1
970	561.16	564.209	566.218	660.302	2.00851	5360	2	2	0	3
971	561.28	494.188	496.191	520.259	2.00318	9020	2	2	0	1
972	561.28	574.204	576.208	680.292	2.00404	5200	2	2	0	4
973	561.72	569.213	571.216	670.31	2.00265	6290	2	2	0	1
974	562.161	420.159	422.165	186.101	2.00626	37571.4	1	1	0	16
975	562.495	371.107	373.113	137.048	2.00637	33100	1	1	5	20
976	562.535	558.194	560.196	648.271	2.00193	6295	2	2	0	10
977	562.83	515.192	517.195	562.267	2.00378	5490	2	2	0	4
978	562.87	576.208	578.212	684.299	2.00368	6140	2	2	0	2
979	563.32	536.206	538.209	604.294	2.00311	4330	2	2	0	11
980	563.52	500.183	502.188	532.249	2.00571	7330	2	2	0	1
981	563.857	429.145	431.152	390.173	2.00765	29400	2	2	0	5
982	564.28	567.211	569.218	666.306	2.00701	4520	2	2	0	11
983	564.585	506.189	508.196	544.261	2.0069	8415	2	2	0	6
984	564.72	442.159	444.169	416.202	2.00937	9680	2	2	0	0
985	564.947	482.181	484.185	496.245	2.0037	7073.33	2	2	0	6
986	564.973	429.649	431.655	195.59	2.00659	12214.5	1	1	0	0
987	565.16	393.138	395.145	159.079	2.00687	48100	1	1	0	0
988	565.16	545.2	547.212	622.284	2.012	7100	2	2	0	5
989	565.44	400.107	402.114	166.049	2.00632	121000	1	1	5	36
990	565.558	393.636	395.641	159.578	2.00517	14844.4	1	1	0	0
991	565.593	423.159	425.164	189.101	2.00512	115317	1	1	0	30
992	565.81	393.142	395.146	159.084	2.00432	19100	1	1	0	0
993	566.59	769.297	771.297	1070.48	2.00076	3910	2	2	0	2
994	566.697	353.247	355.256	119.188	2.00949	50850	1	1	0	0
995	567.37	497.189	499.192	526.261	2.00329	6140	2	2	0	1
996	567.59	480.183	482.188	492.249	2.00504	3980	2	2	0	1
997	567.67	427.254	429.26	193.196	2.00624	70300	1	1	0	0
998	567.935	429.261	431.271	195.203	2.01011	14550	1	1	0	0
999	567.977	530.199	532.203	592.282	2.00367	6323.33	2	2	0	2
1000	568.215	448.188	450.191	214.13	2.00283	31133.3	1	1	1	7
1001	568.31	527.19	529.196	586.264	2.006	7160	2	2	0	7
1002	568.395	335.236	337.244	101.177	2.00831	19200	1	1	0	0
1003	568.426	478.178	480.184	488.24	2.00517	6784	2	2	1	33
1004	568.53	711.287	713.299	954.457	2.01239	3570	2	2	0	0
1005	568.592	335.142	337.147	101.084	2.00547	136334	1	1	0	20
1006	568.6	543.203	545.208	618.288	2.00525	5020	2	2	0	4
1007	568.635	558.2	560.202	648.284	2.00194	5225	2	2	0	5
1008	568.9	479.183	481.185	490.249	2.00222	4770	2	2	0	0
1009	568.95	332.135	334.142	196.152	2.00769	4360	2	2	0	0
1010	569.227	837.542	839.552	603.484	2.01005	6950	1	1	0	22
1011	569.58	505.12	507.127	271.062	2.00659	45100	1	1	0	7
1012	569.815	579.247	581.253	345.189	2.00552	36984.6	1	1	0	2
1013	569.829	393.629	395.636	159.571	2.00658	20772.1	1	1	0	0
1014	569.875	531.193	533.199	594.269	2.00642	6890	2	2	0	5
1015	570.34	607.232	609.239	746.348	2.00688	5930	2	2	0	1
1016	570.7	590.225	592.232	712.334	2.00623	3340	2	2	0	1
1017	570.76	574.218	576.225	680.319	2.00775	6240	2	2	0	1
1018	570.97	550.199	552.21	632.282	2.01055	7350	2	2	0	10
1019	571.32	559.211	561.218	650.306	2.00644	5385	2	2	0	24
1020	571.985	531.2	533.208	594.283	2.00805	7005	2	2	0	16
1021	572.008	576.214	578.222	684.312	2.00796	5890	2	2	0	1
1022	572.16	497.183	499.192	526.249	2.00921	8600	2	2	0	6
1023	572.32	410.155	412.158	352.194	2.00303	3690	2	2	0	4
1024	572.366	455.162	457.167	442.208	2.00483	8210	2	2	0	3
1025	572.44	337.125	339.129	103.067	2.00366	942000	1	1	8	45
1026	572.697	429.149	431.155	390.182	2.0056	23802.2	2	2	0	1
1027	572.995	430.155	432.165	392.194	2.0098	8240	2	2	0	11
1028	573.15	504.187	506.192	540.258	2.00477	7355	2	2	1	11
1029	573.24	584.217	586.222	700.317	2.00503	6740	2	2	0	2
1030	573.31	502.189	504.197	536.261	2.00824	7230	2	2	0	3
1031	573.54	277.105	279.113	43.0464	2.00784	10800	1	1	0	4
1032	573.96	590.235	592.245	712.352	2.01031	6500	2	2	0	6
1033	574.19	658.255	660.262	848.393	2.00728	4670	2	2	0	0
1034	574.4	465.179	467.182	462.242	2.00225	8030	2	2	0	7
1035	574.825	728.286	730.285	988.455	1.99982	3350	2	2	0	0
1036	574.943	400.085	402.092	166.027	2.00631	461228	1	1	3	22
1037	574.98	528.195	530.199	588.273	2.00374	6870	2	2	0	3
1038	575.29	290.12	292.126	112.124	2.00594	4120	2	2	0	2
1039	575.6	428.163	430.171	388.209	2.00761	9610	2	2	0	0
1040	575.63	670.265	672.275	872.413	2.00953	3210	2	2	0	0
1041	575.74	698.277	700.28	928.437	2.00348	3240	2	2	0	0
1042	575.81	465.17	467.176	462.224	2.00597	9930	2	2	1	18
1043	576.04	385.121	387.128	151.063	2.00639	27240	1	1	3	36
1044	576.08	353.144	355.151	119.086	2.00658	10500	1	1	0	0
1045	576.13	724.288	726.289	980.46	2.00046	4450	2	2	0	1
1046	576.23	773.296	775.296	1078.48	1.99938	3100	2	2	0	0
1047	576.332	546.206	548.212	624.296	2.00588	5418.33	2	2	0	0
1048	576.463	363.137	365.144	129.079	2.00691	96301.6	1	1	4	30
1049	576.54	712.282	714.286	956.448	2.00332	3940	2	2	0	0
1050	576.71	548.212	550.218	628.307	2.00588	8470	2	2	0	17
1051	577.05	759.293	761.293	1050.47	1.99969	2450	2	2	0	0
1052	577.137	303.117	305.124	69.059	2.00648	14014.3	1	1	0	2
1053	577.28	712.27	714.282	956.423	2.0121	7800	2	2	0	1
1054	577.3	618.238	620.247	768.359	2.00972	4690	2	2	0	1
1055	577.453	575.216	577.222	682.316	2.00575	6193.33	2	2	0	3
1056	577.55	752.283	754.295	1036.45	2.012	3950	2	2	0	0
1057	577.91	256.579	258.585	22.5205	2.00654	14300	1	1	0	0
1058	577.98	641.253	643.258	814.388	2.00586	5660	2	2	0	3
1059	578.1	556.208	558.211	644.299	2.00298	5510	2	2	0	9
1060	578.323	560.201	562.209	652.285	2.0086	5980	2	2	0	0
1061	578.4	692.269	694.273	916.42	2.00453	4290	2	2	0	0
1062	578.61	457.165	459.173	446.213	2.00805	4220	2	2	0	1
1063	578.64	460.173	462.178	452.229	2.00503	7280	2	2	0	5
1064	578.83	524.199	526.203	580.281	2.00436	5170	2	2	0	4
1065	579.18	498.181	500.185	528.246	2.00409	10700	2	2	0	11
1066	579.23	257.08	259.088	46.0437	2.00812	7690	2	2	1	20
1067	579.887	256.078	258.084	44.0385	2.00665	30409	2	2	0	1
1068	580.19	365.145	367.152	131.087	2.00635	14400	1	1	0	0
1069	580.22	415.099	417.108	181.041	2.00824	14200	1	1	1	27
1070	580.44	257.085	259.09	46.0533	2.00504	4905	2	2	0	1
1071	580.896	367.079	369.084	133.02	2.00518	56815	1	1	0	4
1072	580.907	305.13	307.136	71.0722	2.0058	21066.7	1	1	0	6
1073	581.571	448.19	450.196	214.132	2.00574	206062	1	1	1	7
1074	581.69	489.174	491.183	510.232	2.00838	7050	2	2	0	7
1075	582.135	429.648	431.656	195.59	2.0074	9995	1	1	0	0
1076	582.157	540.198	542.207	612.28	2.00845	5090	2	2	0	9
1077	582.23	410.16	412.165	352.204	2.00469	4120	2	2	0	4
1078	582.32	591.23	593.237	714.344	2.00677	4100	2	2	0	0
1079	583.083	436.189	438.196	202.131	2.00649	107521	1	1	0	14
1080	584.04	394.096	396.102	160.038	2.00609	86050	1	1	2	39
1081	584.05	400.101	402.111	166.042	2.01053	231000	1	1	0	11
1082	584.21	492.178	494.186	516.24	2.00784	6316.67	2	2	0	6
1083	584.23	491.185	493.193	514.254	2.00789	11500	2	2	0	4
1084	584.278	477.175	479.179	486.233	2.00433	6765	2	2	0	7
1085	584.33	479.17	481.181	490.223	2.01105	6190	2	2	0	10
1086	584.54	373.136	375.141	278.156	2.0049	5840	2	2	1	8
1087	584.56	408.159	410.166	348.202	2.0072	5120	2	2	0	1
1088	584.591	335.142	337.148	101.084	2.00618	165396	1	1	0	20
1089	584.872	586.226	588.23	704.335	2.00465	6045	2	2	0	0
1090	585.23	500.184	502.19	266.126	2.00566	23125	1	1	0	14
1091	585.297	378.145	380.153	144.086	2.00866	26961.1	1	1	0	17
1092	585.39	562.204	564.213	656.291	2.00942	4806.67	2	2	0	5
1093	585.45	384.112	386.119	150.054	2.00659	137000	1	1	10	65
1094	585.512	464.665	466.672	230.607	2.00631	12699.6	1	1	0	0
1095	585.6	526.195	528.201	584.274	2.00586	5070	2	2	0	4
1096	585.817	562.212	564.218	656.307	2.00594	5571.67	2	2	0	2
1097	586.28	558.197	560.204	648.277	2.00753	9760	2	2	0	12
1098	586.54	570.213	572.22	672.31	2.00659	5820	2	2	0	2
1099	586.69	476.175	478.181	484.233	2.0066	8820	2	2	0	4
1100	587.07	304.122	306.129	140.128	2.00652	4050	2	2	0	0
1101	587.673	527.199	529.204	586.281	2.00447	6147.5	2	2	0	7
1102	587.87	655.252	657.26	842.387	2.00845	2890	2	2	0	2
1103	588.035	560.207	562.216	652.298	2.0086	6181.67	2	2	0	1
1104	589.062	422.175	424.181	188.116	2.00627	251797	1	1	3	25
1105	589.235	265.098	267.106	31.0392	2.00881	12210	1	1	1	7
1106	589.39	482.172	484.177	496.227	2.00538	4960	2	2	0	10
1107	589.58	362.141	364.146	256.166	2.00436	6590	2	2	0	4
1108	589.72	505.186	507.192	542.255	2.00647	6460	2	2	0	2
1109	590.23	634.241	636.248	800.366	2.00707	5215	2	2	0	0
1110	590.24	656.24	658.247	844.363	2.00709	4580	2	2	0	0
1111	590.34	521.242	523.248	287.183	2.00645	37500	1	1	0	0
1112	590.505	507.188	509.196	546.26	2.00774	5515	2	2	0	5
1113	590.55	559.216	561.221	650.316	2.00423	8650	2	2	0	0
1114	590.82	538.202	540.21	608.288	2.00747	5140	2	2	0	10
1115	591.01	580.217	582.224	692.318	2.00645	5330	2	2	0	4
1116	591.27	601.23	603.234	734.343	2.00442	5180	2	2	0	2
1117	591.655	430.159	432.164	392.2	2.00583	8600	2	2	0	13
1118	591.962	442.166	444.172	416.215	2.00615	7828	2	2	0	2
1119	592.07	633.242	635.243	798.367	2.00117	6010	2	2	0	2
1120	592.205	487.171	489.178	506.226	2.00671	7095	2	2	0	0
1121	592.29	510.178	512.189	552.24	2.01067	9010	2	2	0	2
1122	592.366	485.163	487.171	502.208	2.00818	9754	2	2	0	5
1123	592.48	550.209	552.213	632.302	2.00382	5580	2	2	0	2
1124	592.71	602.228	604.238	736.34	2.00934	6480	2	2	0	0
1125	592.85	481.18	483.184	494.244	2.00377	6670	2	2	0	5
1126	592.93	798.207	800.212	564.148	2.00553	31400	1	1	0	2
1127	593.611	438.149	440.155	204.091	2.00625	1.89277e+06	1	1	1	15
1128	593.73	603.222	605.233	738.328	2.01013	4580	2	2	0	1
1129	593.958	471.17	473.174	237.111	2.00418	73269.1	1	1	0	10
1130	593.97	547.215	549.218	626.313	2.00256	5150	2	2	0	2
1131	594.7	560.196	562.203	652.275	2.00682	7920	2	2	1	4
1132	595.206	478.172	480.181	488.228	2.00906	7324	2	2	0	0
1133	595.38	530.186	532.192	592.256	2.00609	5350	2	2	0	3
1134	595.55	390.15	392.156	312.184	2.00612	6400	2	2	0	8
1135	595.82	434.169	436.171	400.221	2.00272	5170	2	2	0	1
1136	595.85	396.136	398.141	324.155	2.00553	19195.3	2	2	1	9
1137	595.86	518.207	520.21	568.298	2.0028	4310	2	2	0	11
1138	595.992	397.14	399.146	326.164	2.00543	6921.67	2	2	0	4
1139	596.05	331.113	333.12	97.0546	2.00728	12400	1	1	0	8
1140	596.53	704.269	706.274	940.422	2.00432	3820	2	2	0	0
1141	596.729	349.157	351.164	115.099	2.00672	54579.6	1	1	0	21
1142	597.14	654.259	656.264	840.402	2.00479	4540	2	2	0	16
1143	597.59	548.196	550.204	628.276	2.00797	5466.67	2	2	0	1
1144	597.9	505.193	507.196	542.269	2.00336	4180	2	2	1	5
1145	598	534.205	536.208	600.292	2.00349	5275	2	2	0	3
1146	598.804	432.16	434.168	396.203	2.00814	9038	2	2	0	23
1147	599.48	492.18	494.185	258.122	2.00474	13400	1	1	0	9
1148	599.6	548.203	550.208	628.288	2.00574	5905	2	2	0	3
1149	599.995	499.187	501.191	530.258	2.0037	4955	2	2	0	12
1150	600.11	416.157	418.168	364.197	2.0108	5520	2	2	0	4
1151	600.42	506.183	508.187	544.25	2.00307	7410	2	2	0	10
1152	600.513	363.137	365.145	129.079	2.00777	22925	1	1	4	30
1153	600.59	573.212	575.222	678.308	2.0101	6520	2	2	0	2
1154	600.84	697.278	699.281	926.44	2.00249	2770	2	2	0	0
1155	600.9	574.203	576.213	680.29	2.00961	6130	2	2	0	4
1156	600.905	504.182	506.188	540.247	2.00598	5340	2	2	0	4
1157	601.142	458.074	460.082	224.016	2.00767	47124.4	1	1	0	3
1158	601.36	503.187	505.191	538.257	2.00425	5786.67	2	2	0	9
1159	601.535	435.167	437.174	402.218	2.00729	7955	2	2	0	5
1160	601.59	716.277	718.278	964.437	2.0013	3560	2	2	0	0
1161	601.61	502.18	504.184	536.244	2.00349	4760	2	2	0	0
1162	601.71	597.23	599.234	726.344	2.00408	5410	2	2	0	0
1163	602.283	425.303	427.312	191.244	2.00925	4609.23	1	1	0	0
1164	602.289	351.144	353.149	117.085	2.00556	32155.6	1	1	0	0
1165	602.479	519.226	521.232	285.168	2.00624	42430	1	1	0	3
1166	602.55	489.184	491.186	510.252	2.00204	5690	2	2	0	1
1167	602.598	501.181	503.189	534.245	2.00821	5828.33	2	2	0	3
1168	602.872	405.12	407.129	342.124	2.00831	24144.4	2	2	0	6
1169	603.48	529.2	531.206	590.283	2.00585	6110	2	2	0	8
1170	603.74	475.172	477.176	482.227	2.00434	5445	2	2	0	3
1171	604.455	490.177	492.181	512.237	2.00453	7985	2	2	0	4
1172	604.65	499.18	501.184	530.243	2.00375	6450	2	2	0	4
1173	605.02	487.31	489.317	253.251	2.00695	10500	1	1	0	0
1174	605.07	481.171	483.179	494.225	2.00786	8700	2	2	0	4
1175	605.175	528.191	530.194	588.265	2.00334	6275	2	2	0	6
1176	605.4	469.166	471.172	470.215	2.00621	7880	2	2	0	9
1177	605.488	480.163	482.169	246.105	2.0061	32309.4	1	1	0	10
1178	605.725	473.173	475.177	478.229	2.00471	4930	2	2	0	4
1179	606.03	539.186	541.19	610.256	2.00418	7250	2	2	0	2
1180	606.06	362.139	364.143	256.16	2.00485	3120	2	2	0	1
1181	606.496	527.191	529.196	586.265	2.00491	6362.5	2	2	0	7
1182	606.55	586.23	588.232	704.343	2.00152	5380	2	2	0	2
1183	607.672	436.189	438.195	202.131	2.00608	129897	1	1	0	14
1184	608.275	335.142	337.149	101.084	2.00622	224788	1	1	0	20
1185	608.55	501.188	503.191	534.259	2.0035	6370	2	2	0	9
1186	608.82	277.103	279.111	43.0446	2.00858	10715	1	1	0	4
1187	608.822	442.162	444.168	416.207	2.00587	6837.69	2	2	0	1
1188	609.33	356.132	358.138	244.146	2.00597	3910	2	2	0	6
1189	609.5	530.203	532.205	592.29	2.00218	5840	2	2	0	0
1190	609.865	470.165	472.169	472.213	2.0046	6045	2	2	0	2
1191	610.185	374.117	376.123	140.059	2.00644	416469	1	1	4	17
1192	610.505	497.18	499.188	526.243	2.00833	5080	2	2	0	10
1193	610.622	541.196	543.202	614.275	2.00613	5664	2	2	0	2
1194	610.68	539.199	541.202	610.281	2.00313	5335	2	2	0	8
1195	611.07	428.16	430.167	388.204	2.00636	4985	2	2	0	5
1196	611.38	431.161	433.168	394.206	2.00697	4505	2	2	0	7
1197	611.48	394.12	396.125	160.062	2.00456	12000	1	1	0	4
1198	611.56	424.156	426.161	380.196	2.00466	11100	2	2	0	8
1199	611.843	346.075	348.081	112.017	2.00659	100333	1	1	2	10
1200	612.07	606.231	608.237	744.346	2.00566	4400	2	2	0	3
1201	612.423	401.163	403.169	167.105	2.00616	89406.4	1	1	0	7
1202	612.71	414.153	416.158	360.19	2.00501	6525	2	2	2	24
1203	613.02	350.146	352.151	232.175	2.00494	4480	2	2	0	0
1204	613.1	562.221	564.226	656.325	2.00494	4610	2	2	0	3
1205	613.3	605.227	607.236	742.337	2.00925	3960	2	2	0	2
1206	613.659	305.129	307.137	71.0705	2.0078	23666.9	1	1	0	6
1207	613.674	471.167	473.177	474.218	2.00998	7614	2	2	0	1
1208	614.38	625.237	627.245	782.358	2.00786	3870	2	2	0	2
1209	614.495	456.159	458.165	222.1	2.00606	137876	1	1	0	24
1210	614.594	544.2	546.206	620.283	2.00596	5274	2	2	0	5
1211	614.622	562.208	564.217	656.299	2.00877	4535	2	2	0	0
1212	614.88	519.184	521.186	570.251	2.00204	7690	2	2	0	3
1213	615.03	341.093	343.099	107.035	2.0057	29100	1	1	0	5
1214	615.18	429.149	431.16	390.182	2.0106	8160	2	2	0	1
1215	615.3	621.239	623.24	774.362	2.00078	3360	2	2	0	0
1216	615.416	450.205	452.212	216.147	2.00623	242908	1	1	0	15
1217	615.63	386.137	388.143	304.157	2.00664	3140	2	2	0	5
1218	615.7	694.272	696.277	920.427	2.00514	3660	2	2	0	0
1219	615.86	471.173	473.181	474.23	2.0083	6150	2	2	0	4
1220	615.93	543.207	545.211	618.296	2.00472	5020	2	2	0	13
1221	616	443.162	445.168	418.208	2.0058	7223.64	2	2	0	7
1222	616.244	474.172	476.175	240.114	2.00336	35585.7	1	1	0	18
1223	617.307	598.222	600.232	728.327	2.00988	4520	2	2	0	0
1224	617.35	408.154	410.159	348.192	2.00494	6540	2	2	0	31
1225	617.39	530.194	532.198	592.272	2.00428	5710	2	2	0	1
1226	618.45	640.246	642.255	812.376	2.00863	3840	2	2	0	3
1227	618.54	319.112	321.118	85.0535	2.00606	1151032	1	1	1	16
1228	619.46	383.155	385.159	298.194	2.0041	8170	2	2	0	17
1229	619.928	532.194	534.201	596.272	2.00646	5644.62	2	2	0	2
1230	619.94	696.271	698.272	924.425	2.00113	3210	2	2	0	0
1231	619.945	310.592	312.598	76.534	2.00598	6930	1	1	0	0
1232	620.19	546.189	548.192	624.262	2.0033	4380	2	2	0	2
1233	620.2	311.219	313.225	77.1611	2.00588	4410	1	1	0	0
1234	620.26	464.185	466.188	230.127	2.00295	6850	1	1	0	15
1235	620.73	550.206	552.215	632.295	2.00912	5985	2	2	0	6
1236	621.06	395.155	397.159	322.193	2.00402	4120	2	2	0	8
1237	621.105	564.219	566.223	660.321	2.00409	4725	2	2	0	3
1238	621.287	429.641	431.647	195.583	2.0064	6323.33	1	1	0	0
1239	621.833	562.214	564.219	656.312	2.00482	5810	2	2	0	0
1240	621.885	564.209	566.217	660.3	2.00882	4135	2	2	0	2
1241	621.92	487.177	489.182	506.237	2.00465	6025	2	2	0	0
1242	622.02	678.251	680.263	888.385	2.0123	5310	2	2	0	0
1243	622.163	501.133	503.14	267.075	2.00662	32300	1	1	0	19
1244	622.385	519.134	521.141	285.076	2.00623	79775	1	1	0	13
1245	622.49	313.114	315.124	158.112	2.0093	3510	2	2	0	4
1246	622.863	433.161	435.169	398.205	2.00778	8153.33	2	2	0	2
1247	623.11	578.208	580.218	688.299	2.01004	4240	2	2	0	2
1248	623.313	527.185	529.191	586.252	2.00636	7520	2	2	0	9
1249	623.635	407.627	409.634	173.568	2.00771	13848	1	1	0	0
1250	623.815	542.196	544.201	616.275	2.00484	8087.5	2	2	0	1
1251	624.16	570.216	572.219	672.316	2.00309	4380	2	2	0	5
1252	624.468	335.142	337.149	101.084	2.00648	185040	1	1	0	20
1253	625.003	459.166	461.173	450.216	2.00696	6095	2	2	0	1
1254	625.04	377.145	379.148	286.172	2.00346	4700	2	2	0	3
1255	625.273	492.18	494.185	258.121	2.00586	33633.3	1	1	0	9
1256	625.93	477.177	479.184	486.238	2.00636	7610	2	2	0	6
1257	626.04	589.218	591.228	710.319	2.01029	4640	2	2	0	0
1258	626.08	577.225	579.228	686.333	2.00253	7220	2	2	0	4
1259	626.37	624.233	626.234	780.35	2.00058	6860	2	2	0	2
1260	626.69	759.278	761.281	1050.44	2.00311	3240	2	2	0	0
1261	626.93	359.108	361.112	125.05	2.00393	38700	1	1	0	15
1262	627.01	602.215	604.223	736.313	2.00817	4205	2	2	0	0
1263	627.04	532.186	534.194	596.255	2.00859	5130	2	2	0	17
1264	627.15	529.192	531.195	590.268	2.00272	5180	2	2	0	3
1265	627.51	449.171	451.178	430.226	2.00609	7700	2	2	0	1
1266	627.57	489.177	491.187	510.237	2.01018	4740	2	2	0	6
1267	627.7	401.117	403.124	167.059	2.00712	60900	1	1	2	35
1268	628.055	420.157	422.164	186.099	2.00685	50682.8	1	1	0	15
1269	628.08	491.184	493.186	514.252	2.00195	9930	2	2	0	4
1270	628.18	294.122	296.128	120.128	2.0053	2930	2	2	0	2
1271	628.38	447.164	449.174	426.212	2.00998	7080	2	2	0	11
1272	628.614	445.164	447.169	422.212	2.00508	4930	2	2	0	1
1273	629.365	472.17	474.178	476.223	2.008	7720	2	2	1	4
1274	629.42	531.199	533.208	594.281	2.00906	3710	2	2	0	16
1275	629.633	323.137	325.144	89.0786	2.00667	48525	1	1	0	0
1276	629.73	632.242	634.249	796.367	2.00742	4320	2	2	0	0
1277	629.826	478.165	480.171	488.213	2.00666	7562.5	2	2	0	3
1278	629.877	477.147	479.155	486.178	2.0079	10030	2	2	0	3
1279	630.398	378.101	380.107	144.042	2.0065	92861.5	1	1	3	44
1280	630.404	330.06	332.067	192.004	2.00716	4958	2	2	0	0
1281	630.51	740.293	742.3	1012.47	2.00678	3470	2	2	0	15
1282	630.578	506.19	508.195	544.264	2.00509	5962	2	2	0	4
1283	630.609	387.1	389.107	153.042	2.00726	155252	1	1	2	24
1284	630.749	311.084	313.091	154.051	2.00692	45270.7	2	2	0	14
1285	630.895	477.156	479.163	486.195	2.00724	9310	2	2	0	5
1286	630.94	646.249	648.255	824.381	2.00581	4290	2	2	0	0
1287	631.21	485.177	487.18	502.237	2.00296	7090	2	2	0	2
1288	632.019	363.137	365.143	129.078	2.00666	38937.1	1	1	4	30
1289	632.328	534.195	536.201	600.274	2.00513	5170	2	2	0	1
1290	632.53	536.2	538.203	604.284	2.00295	4750	2	2	0	2
1291	632.56	539.204	541.208	610.292	2.00438	5170	2	2	1	3
1292	632.72	661.261	663.271	854.405	2.01016	4560	2	2	0	2
1293	633.09	508.191	510.194	548.265	2.00298	5555	2	2	0	1
1294	633.23	621.159	625.173	154.05	4.01362	122398	1	2	0	14
1295	634.3	509.184	511.19	550.25	2.00631	5100	2	2	0	2
1296	634.5	509.191	511.196	550.266	2.00479	6116.67	2	2	0	2
1297	635.122	457.161	459.167	446.206	2.00597	8838	2	2	0	10
1298	635.16	474.178	476.182	480.239	2.00472	5580	2	2	1	21
1299	635.25	479.174	481.178	490.232	2.00432	6820	2	2	0	2
1300	635.51	455.349	457.358	221.291	2.00858	5820	1	1	0	0
1301	636.367	389.268	391.278	155.21	2.01003	8392.86	1	1	0	0
1302	636.46	441.112	443.116	207.053	2.00448	73100	1	1	1	41
1303	636.61	574.209	576.213	680.301	2.00398	5102.5	2	2	0	2
1304	636.695	588.221	590.225	708.325	2.00367	4250	2	2	0	1
1305	636.97	387.11	389.115	153.051	2.00512	65250	1	1	0	15
1306	636.98	527.196	529.198	586.276	2.0016	4880	2	2	0	9
1307	636.98	528.196	530.201	588.276	2.00478	5760	2	2	0	4
1308	637.2	387.251	389.259	153.193	2.00828	8190	1	1	0	0
1309	637.285	558.197	560.203	648.277	2.00645	4755	2	2	0	7
1310	637.873	612.228	614.231	756.34	2.00324	4760	2	2	0	2
1311	638.017	612.234	614.238	756.352	2.00333	5986.67	2	2	0	0
1312	638.21	571.218	573.221	674.32	2.00276	4670	2	2	0	1
1313	638.3	694.263	696.273	920.408	2.01066	5700	2	2	0	0
1314	638.341	576.207	578.214	684.298	2.00632	4485.56	2	2	0	2
1315	638.356	364.134	366.143	260.152	2.00842	10440	2	2	0	7
1316	638.45	610.232	612.235	752.347	2.00282	4030	2	2	0	3
1317	638.941	464.22	466.226	230.161	2.00673	44820.9	1	1	0	4
1318	639.78	498.179	500.187	528.242	2.00753	6350	2	2	0	8
1319	640.33	343.123	345.133	218.13	2.00913	3230	2	2	0	7
1320	640.57	371.135	373.141	274.154	2.00601	3710	2	2	0	20
1321	641.03	532.195	534.203	596.273	2.00797	8990	2	2	0	2
1322	641.143	577.217	579.222	686.318	2.00514	5148.75	2	2	0	3
1323	641.16	705.281	707.295	942.446	2.0132	2550	2	2	0	0
1324	641.17	378.071	380.074	144.012	2.00379	35766.7	1	1	0	3
1325	641.232	355.262	357.269	121.204	2.00725	7106.67	1	1	0	0
1326	641.317	471.165	473.172	474.213	2.00721	8386.67	2	2	0	4
1327	641.72	575.203	577.212	682.29	2.00894	3430	2	2	0	0
1328	641.98	413.304	415.314	179.246	2.0096	3340	1	1	0	0
1329	642.03	470.174	472.181	236.116	2.00635	29150	1	1	0	14
1330	642.221	363.137	365.143	129.079	2.00652	24001.5	1	1	4	30
1331	642.65	277.101	279.107	43.0423	2.00671	292682	1	1	0	4
1332	643.843	348.101	350.108	114.043	2.00693	63966.7	1	1	2	12
1333	644.04	548.19	550.199	628.263	2.00881	4690	2	2	0	3
1334	644.12	578.211	580.223	688.305	2.01222	4450	2	2	0	3
1335	644.585	368.125	370.132	268.133	2.00756	4885	2	2	0	11
1336	644.718	635.247	637.255	802.377	2.00878	3684	2	2	0	0
1337	644.827	404.155	406.16	340.192	2.00512	4246.67	2	2	0	8
1338	645.13	321.125	323.13	87.0665	2.00481	26900	1	1	1	29
1339	645.347	506.181	508.19	544.245	2.00852	6143.75	2	2	0	4
1340	645.56	311.091	313.097	154.065	2.00657	7800	2	2	1	24
1341	645.57	422.148	424.157	376.179	2.00898	4710	2	2	0	4
1342	645.6	544.204	546.207	620.292	2.00283	5080	2	2	0	13
1343	645.603	548.198	550.206	628.28	2.00736	5380	2	2	0	0
1344	645.76	404.15	406.156	340.183	2.00616	6450	2	2	1	2
1345	645.807	550.202	552.21	632.288	2.00731	4919.29	2	2	0	6
1346	646.127	321.616	323.622	87.5574	2.00639	23000	1	1	0	0
1347	646.21	431.152	433.162	394.188	2.00965	7346.36	2	2	0	13
1348	646.255	633.24	635.248	798.363	2.00765	3990	2	2	0	2
1349	646.304	403.14	405.149	338.164	2.00813	8091.25	2	2	0	4
1350	646.383	408.169	410.175	174.11	2.00571	17315.5	1	1	2	6
1351	646.693	584.217	586.224	700.318	2.00625	6180	2	2	0	2
1352	646.74	335.142	337.149	101.084	2.00647	271599	1	1	0	20
1353	646.819	375.116	377.124	282.116	2.00794	18224.5	2	2	0	5
1354	646.977	322.116	324.123	176.116	2.00666	18512.5	2	2	0	15
1355	647.04	443.162	445.167	418.208	2.00467	6150	2	2	0	7
1356	647.173	321.116	323.122	174.115	2.00608	123238	2	2	3	11
1357	647.43	302.118	304.125	136.119	2.00687	2670	2	2	0	0
1358	647.53	354.143	356.147	240.169	2.00467	4300	2	2	0	6
1359	647.55	575.221	577.228	682.326	2.00692	6680	2	2	0	2
1360	647.855	538.199	540.203	608.282	2.00364	6085	2	2	0	4
1361	648.049	470.17	472.175	472.222	2.00594	7826.43	2	2	0	6
1362	648.275	405.146	407.153	342.176	2.00732	4935	2	2	0	3
1363	648.37	375.122	377.13	282.128	2.00779	11200	2	2	0	13
1364	648.577	468.163	470.17	468.208	2.00736	8743.33	2	2	0	7
1365	648.887	503.188	505.195	538.259	2.00666	6383.33	2	2	0	4
1366	649.03	763.298	765.304	1058.48	2.00523	3600	2	2	0	0
1367	649.11	510.194	512.196	552.272	2.00202	5100	2	2	0	1
1368	649.424	328.615	330.621	94.557	2.00593	10063.6	1	1	0	0
1369	649.617	399.145	401.152	330.173	2.00697	4530	2	2	0	0
1370	650.01	398.146	400.153	328.176	2.00709	7470	2	2	0	3
1371	650.161	532.19	534.197	596.264	2.00621	5810	2	2	0	19
1372	650.455	396.137	398.141	324.157	2.00408	6965	2	2	1	11
1373	650.92	580.219	582.221	692.322	2.0021	3690	2	2	0	8
1374	650.99	506.187	508.191	544.256	2.00413	5270	2	2	0	12
1375	651.03	502.178	504.181	536.24	2.00282	7180	2	2	0	8
1376	651.11	788.309	790.312	1108.5	2.00303	2500	2	2	0	0
1377	651.785	674.258	676.265	880.4	2.00658	3280	2	2	0	0
1378	652.202	550.209	552.213	632.301	2.00443	5905	2	2	0	7
1379	652.57	353.244	355.254	119.186	2.00995	6180	1	1	0	0
1380	652.62	353.238	355.248	119.18	2.00954	3880	1	1	0	0
1381	652.779	393.138	395.143	318.16	2.00427	19398.3	2	2	0	3
1382	652.85	654.249	656.251	840.382	2.0021	5050	2	2	0	0
1383	653.03	471.309	473.32	237.251	2.01027	7620	1	1	0	0
1384	653.58	546.199	548.206	624.281	2.00718	6030	2	2	0	6
1385	653.793	478.173	480.178	488.228	2.00499	6730.91	2	2	0	0
1386	654.25	422.154	424.161	376.191	2.00764	8890	2	2	1	15
1387	654.35	560.196	562.207	652.275	2.01177	4180	2	2	1	7
1388	654.407	512.189	514.196	556.262	2.00638	6261.67	2	2	0	4
1389	654.51	457.167	459.171	446.218	2.00329	6450	2	2	0	0
1390	654.537	478.178	480.184	488.24	2.00539	6023.33	2	2	1	33
1391	654.555	541.209	543.213	614.302	2.00343	5570	2	2	0	6
1392	654.6	548.204	550.211	628.292	2.00643	6345	2	2	0	2
1393	655.16	456.166	458.17	444.215	2.00403	6740	2	2	0	3
1394	655.186	544.195	546.201	620.274	2.00558	5447.14	2	2	0	1
1395	655.213	415.152	417.156	362.186	2.00401	7426.67	2	2	0	6
1396	655.43	279.113	281.117	45.0547	2.00441	3810	1	1	1	12
1397	655.59	500.182	502.184	532.248	2.00191	6250	2	2	0	11
1398	655.82	547.205	549.215	626.293	2.01057	3760	2	2	0	11
1399	655.99	384.139	386.144	300.162	2.00493	5200	2	2	0	0
1400	656.046	379.134	381.138	145.076	2.00433	80985.7	1	1	6	54
1401	656.31	593.263	595.268	359.205	2.00514	33478.9	1	1	0	0
1402	656.32	514.186	516.189	560.256	2.00316	6440	2	2	0	2
1403	656.703	535.256	537.262	301.198	2.00562	32733.3	1	1	0	0
1404	657.03	455.163	457.166	442.21	2.00251	10700	2	2	0	3
1405	657.373	403.147	405.151	338.177	2.0047	6786.67	2	2	0	6
1406	657.75	573.213	575.215	678.31	2.00218	4740	2	2	0	3
1407	657.96	542.198	544.203	616.278	2.00579	5770	2	2	0	3
1408	658.015	482.176	484.183	496.235	2.00667	8685	2	2	0	6
1409	658.62	579.223	581.225	690.329	2.00155	5700	2	2	0	2
1410	658.7	541.204	543.212	614.291	2.00847	4063.33	2	2	0	2
1411	659.575	431.158	433.165	394.199	2.00688	5530	2	2	0	17
1412	659.745	355.259	357.267	121.201	2.00789	3700	1	1	0	0
1413	659.805	624.236	626.24	780.355	2.00446	3935	2	2	0	1
1414	659.954	464.219	466.226	230.161	2.00647	33833.3	1	1	0	4
1415	660.11	317.118	319.123	83.0597	2.00535	17300	1	1	0	0
1416	660.58	603.222	605.234	738.327	2.01236	3610	2	2	0	3
1417	660.58	722.266	724.278	976.414	2.0129	2950	2	2	0	0
1418	660.616	335.142	337.149	101.084	2.00653	306550	1	1	0	20
1419	661.37	441.112	443.118	207.054	2.00635	926464	1	1	1	41
1420	661.39	317.113	319.118	83.0545	2.00504	18000	1	1	0	0
1421	661.47	582.221	584.232	696.325	2.01159	3880	2	2	0	7
1422	661.48	476.172	478.178	484.228	2.00546	6423.33	2	2	0	5
1423	661.56	502.185	504.188	536.253	2.00317	4040	2	2	0	0
1424	662.112	360.101	362.108	126.043	2.00622	6.76629e+06	1	1	2	17
1425	662.257	296.139	298.146	62.0807	2.00663	59893.5	1	1	0	1
1426	662.443	317.103	319.111	83.0446	2.00824	40300	1	1	1	1
1427	662.51	317.109	319.114	83.0509	2.00518	32400	1	1	1	1
1428	663.01	498.176	500.179	528.235	2.00276	5260	2	2	0	3
1429	663.09	515.184	517.193	562.251	2.0087	5630	2	2	0	18
1430	663.686	364.625	366.632	130.567	2.00651	25739.5	1	1	0	0
1431	664.295	480.174	482.178	492.232	2.0032	6232.5	2	2	0	25
1432	664.59	527.191	529.198	586.265	2.00698	3690	2	2	0	7
1433	664.98	371.257	373.267	137.199	2.0091	5140	1	1	0	0
1434	665.01	549.208	551.214	630.3	2.00558	3530	2	2	0	1
1435	665.285	385.117	387.123	151.059	2.00569	26550	1	1	3	35
1436	665.867	504.181	506.187	540.246	2.00531	5031	2	2	0	5
1437	665.877	529.195	531.2	590.272	2.00524	4410	2	2	0	3
1438	667.03	353.141	355.146	119.082	2.0049	25164.3	1	1	0	0
1439	667.33	468.172	470.175	468.227	2.00326	6340	2	2	0	6
1440	667.476	399.137	401.144	165.079	2.00633	1.15517e+07	1	1	4	49
1441	667.85	484.169	486.175	500.222	2.00578	7920	2	2	0	7
1442	667.94	458.157	460.164	448.197	2.00759	6570	2	2	0	2
1443	668.26	399.313	401.316	165.255	2.0029	987000	1	1	0	0
1444	668.7	413.141	415.148	358.166	2.00634	9460	2	2	0	4
1445	668.94	534.196	536.204	600.274	2.00819	4620	2	2	0	1
1446	669.07	399.307	401.316	165.249	2.00895	1090000	1	1	0	0
1447	670.185	421.12	423.126	187.061	2.00672	174000	1	1	1	10
1448	671.63	589.22	591.228	710.323	2.00828	5180	2	2	0	0
1449	671.633	612.267	616.279	145.157	4.01253	59794.5	1	2	1	3
1450	671.92	584.206	586.218	700.296	2.01198	3470	2	2	0	1
1451	671.979	321.124	323.129	87.0656	2.00549	10175.7	1	1	1	29
1452	672.03	467.169	469.174	466.22	2.0056	4550	2	2	0	13
1453	672.13	598.219	600.229	728.322	2.00926	2820	2	2	0	0
1454	672.26	649.246	651.255	830.375	2.00931	3830	2	2	0	0
1455	672.38	592.222	594.226	716.327	2.00449	3770	2	2	0	0
1456	672.42	543.199	545.201	618.282	2.00193	5360	2	2	0	3
1457	672.51	586.216	588.221	704.315	2.00485	3270	2	2	0	3
1458	672.577	487.166	489.173	506.215	2.00677	4576.67	2	2	0	11
1459	672.61	527.198	529.204	586.279	2.00619	3960	2	2	0	9
1460	672.697	432.152	434.158	396.188	2.00578	6018.57	2	2	0	5
1461	673.1	493.182	495.187	518.248	2.00487	5230	2	2	0	5
1462	673.245	611.233	613.241	754.349	2.00756	6090	2	2	0	4
1463	673.26	458.168	460.171	448.219	2.00308	4790	2	2	0	4
1464	673.5	509.183	511.188	550.249	2.0054	6020	2	2	0	2
1465	673.68	470.176	472.179	472.236	2.00289	6620	2	2	0	2
1466	673.718	377.153	379.159	143.095	2.00629	241562	1	1	1	19
1467	673.79	511.19	513.192	554.263	2.00254	4190	2	2	0	3
1468	674.267	363.137	365.147	129.079	2.00927	746923	1	1	4	30
1469	674.36	473.176	475.179	478.235	2.00315	4020	2	2	0	3
1470	675.825	373.099	375.106	139.041	2.00629	15550	1	1	1	5
1471	676.51	576.214	578.224	684.312	2.00934	4135	2	2	0	1
1472	677.93	616.279	618.281	382.221	2.00194	11200	1	1	0	9
1473	678.01	457.145	459.153	223.087	2.00844	14200	1	1	1	30
1474	678.312	335.299	337.309	101.241	2.00928	1.39863e+06	1	1	0	0
1475	678.354	335.143	337.149	101.085	2.00633	2.12626e+07	1	1	0	20
1476	678.645	474.169	476.174	480.222	2.0046	4785	2	2	0	1
1477	678.678	518.184	520.193	568.251	2.00931	4900	2	2	0	3
1478	678.819	335.304	337.309	101.246	2.00427	1.35593e+06	1	1	0	0
1479	679.19	389.141	391.147	155.083	2.00601	16800	1	1	0	4
1480	679.277	498.204	500.21	264.146	2.00585	18158.3	1	1	0	11
1481	679.565	534.201	536.207	600.285	2.00634	4390	2	2	0	3
1482	681.149	365.153	367.159	131.095	2.00643	9.2924e+06	1	1	6	36
1483	683.035	607.278	609.283	373.22	2.00518	15650	1	1	0	0
1484	683.6	613.232	615.232	758.347	2.00085	4380	2	2	0	4
1485	683.978	477.672	479.678	243.614	2.00601	7413.12	1	1	0	0
1486	684.5	393.139	395.143	318.162	2.00354	15500	2	2	0	3
1487	684.882	434.174	436.179	200.115	2.00565	23029.7	1	1	0	11
1488	684.95	502.178	504.184	536.239	2.00686	4480	2	2	0	9
1489	685.15	582.212	584.218	696.307	2.0065	4500	2	2	0	1
1490	685.85	487.304	489.315	253.246	2.01103	5290	1	1	0	0
1491	685.976	388.639	390.645	154.581	2.00617	20912.5	1	1	0	0
1492	686.015	540.196	542.202	612.274	2.00656	5822.5	2	2	0	13
1493	686.15	554.206	556.213	640.295	2.007	5042.67	2	2	0	3
1494	686.596	405.146	407.154	171.088	2.00735	72393.3	1	1	0	30
1495	686.61	442.161	444.166	416.206	2.0047	5243.33	2	2	0	1
1496	686.96	471.163	473.172	474.208	2.00975	4870	2	2	1	5
1497	687.04	496.183	498.186	524.249	2.00321	5180	2	2	0	5
1498	687.12	429.151	431.156	390.186	2.00442	7800	2	2	0	4
1499	687.15	546.19	548.201	624.263	2.01173	5160	2	2	0	2
1500	687.157	371.633	373.639	137.574	2.0063	23249.6	1	1	0	0
1501	687.234	515.187	517.194	562.258	2.00667	3960	2	2	1	19
1502	687.408	389.137	391.144	310.156	2.00714	19850	2	2	0	13
1503	687.715	388.136	390.143	308.155	2.0074	78113	2	2	0	12
1504	688.02	562.208	564.217	656.3	2.00902	5050	2	2	0	2
1505	688.05	417.154	419.159	366.191	2.00506	4360	2	2	0	11
1506	688.345	265.098	267.104	31.0393	2.00657	31800	1	1	1	7
1507	688.372	489.177	491.182	510.237	2.0049	5040	2	2	0	6
1508	688.54	357.618	359.628	123.56	2.00931	5770	1	1	0	0
1509	688.67	578.217	580.219	688.318	2.00113	3350	2	2	0	10
1510	688.83	381.144	383.153	294.172	2.00831	3960	2	2	0	4
1511	688.9	488.168	490.172	508.219	2.00444	5220	2	2	0	3
1512	688.976	420.16	422.164	186.102	2.00447	26064.6	1	1	0	16
1513	689.55	402.102	404.108	168.044	2.00515	106480	1	1	7	25
1514	689.722	391.144	393.149	314.171	2.00518	6105	2	2	0	6
1515	690.215	379.14	381.146	290.164	2.00601	6395	2	2	0	6
1516	690.63	398.144	400.15	328.172	2.00529	5700	2	2	0	14
1517	690.86	459.168	461.175	450.218	2.00745	5450	2	2	0	2
1518	691.263	595.258	597.264	361.2	2.00541	64959.8	1	1	0	8
1519	691.515	365.153	367.159	131.095	2.00657	7262500	1	1	6	36
1520	691.745	546.2	548.209	624.284	2.00836	4565	2	2	0	0
1521	691.9	396.142	398.148	324.167	2.00628	4885	2	2	2	17
1522	695.64	454.108	456.114	220.049	2.00591	53700	1	1	0	18
1523	695.797	560.209	562.213	652.301	2.00432	4236.67	2	2	0	1
1524	697.57	543.207	545.214	618.298	2.00638	6323.33	2	2	0	12
1525	697.625	462.205	464.211	228.147	2.00589	183121	1	1	2	3
1526	698.02	555.21	559.223	88.1011	4.01268	14600	1	2	1	5
1527	699.11	470.167	472.174	472.218	2.00678	5120	2	2	0	6
1528	702.462	365.317	367.326	131.259	2.00882	1.17107e+06	1	1	0	0
1529	702.906	365.154	367.16	131.095	2.00647	1.83943e+07	1	1	6	36
1530	703	365.323	367.326	131.264	2.00378	1010000	1	1	0	0
1531	705.39	512.182	514.191	556.248	2.00866	4690	2	2	0	3
1532	706.16	485.161	487.165	502.204	2.00488	7490	2	2	0	7
1533	706.6	415.147	417.155	362.178	2.00737	6550	2	2	0	1
1534	707.114	448.192	450.197	214.134	2.00503	44177.4	1	1	1	7
1535	707.35	588.226	590.232	708.335	2.00586	4210	2	2	0	2
1536	707.39	355.265	357.274	121.207	2.00885	46900	1	1	0	0
1537	707.41	420.162	422.166	372.207	2.00384	3770	2	2	0	8
1538	708.14	580.216	582.221	692.316	2.00458	3080	2	2	0	4
1539	708.18	509.192	511.198	550.267	2.00576	3910	2	2	0	3
1540	708.82	651.25	653.256	834.384	2.00595	2630	2	2	0	7
1541	709.134	398.047	400.053	163.989	2.00533	7881.25	1	1	0	1
1542	709.24	558.211	560.217	648.306	2.00544	5280	2	2	0	1
1543	709.282	400.148	402.152	332.179	2.00425	8614	2	2	0	11
1544	709.3	488.178	490.183	508.24	2.00464	5765	2	2	0	4
1545	709.51	560.198	562.204	652.279	2.00664	5060	2	2	0	0
1546	709.513	372.105	374.112	138.047	2.00638	590037	1	1	2	20
1547	709.52	420.156	422.163	372.196	2.00626	8690	2	2	0	15
1548	709.546	405.149	407.156	171.091	2.00646	16216.7	1	1	0	30
1549	709.569	360.094	362.1	126.035	2.00629	883908	1	1	0	15
1550	710.13	552.217	554.22	636.316	2.00389	4380	2	2	0	7
1551	710.46	745.17	747.171	511.111	2.00129	31133.3	1	1	0	5
1552	710.55	543.218	545.221	618.32	2.00242	4810	2	2	0	11
1553	711.59	598.228	600.232	728.339	2.00374	7990	2	2	0	4
1554	712.23	388.139	390.146	308.162	2.00656	14000	2	2	0	16
1555	712.76	530.187	532.192	592.258	2.00456	4550	2	2	0	3
1556	712.965	558.202	560.204	648.286	2.00218	4025	2	2	0	11
1557	713.05	407.157	409.163	173.098	2.0068	22850	1	1	0	3
1558	713.45	597.23	599.233	726.343	2.00284	5260	2	2	0	0
1559	713.976	343.621	345.627	109.563	2.00633	7759.27	1	1	0	0
1560	714.08	624.234	626.242	780.351	2.00816	3480	2	2	0	2
1561	714.16	330.111	332.117	192.105	2.00586	7030	2	2	0	1
1562	714.64	296.566	298.573	125.015	2.00693	45800	2	2	1	5
1563	715.206	513.187	515.191	558.256	2.00449	5416	2	2	1	12
1564	715.24	622.232	624.243	776.347	2.01065	3900	2	2	0	1
1565	715.78	487.154	489.159	253.095	2.00545	23566.7	1	1	1	10
1566	715.841	385.121	387.129	151.063	2.00743	197795	1	1	3	36
1567	715.95	391.139	393.144	314.162	2.00444	4490	2	2	0	5
1568	716.54	555.22	557.223	642.324	2.00219	6400	2	2	0	12
1569	717.05	599.223	601.234	730.33	2.01117	5440	2	2	0	3
1570	717.42	678.268	680.271	888.419	2.00308	2930	2	2	0	0
1571	717.87	491.179	493.182	514.242	2.00306	7020	2	2	0	1
1572	718.44	558.195	560.204	648.273	2.00925	5330	2	2	0	10
1573	718.45	588.216	590.22	708.315	2.00399	3920	2	2	0	1
1574	718.64	492.178	494.185	516.24	2.00704	5635	2	2	0	6
1575	718.78	481.144	483.15	247.086	2.0058	31440.6	1	1	0	11
1576	718.781	265.097	267.103	31.0386	2.00645	12406.7	1	1	1	7
1577	718.88	525.183	527.195	582.249	2.01193	3150	2	2	1	2
1578	719.1	325.105	327.11	91.0463	2.00536	28629.1	1	1	0	6
1579	719.42	303.116	305.124	69.0574	2.00863	6210	1	1	0	2
1580	720.59	623.242	625.243	778.367	2.00057	5700	2	2	0	1
1581	720.773	388.135	390.142	308.154	2.00677	7996.67	2	2	0	7
1582	720.81	511.183	513.187	554.248	2.00412	4920	2	2	1	8
1583	721.625	532.195	534.206	596.273	2.01101	4655	2	2	0	2
1584	721.829	300.087	302.094	132.057	2.00756	11204.7	2	2	5	21
1585	721.84	471.31	473.32	237.252	2.01038	4660	1	1	0	0
1586	722.38	333.136	335.142	99.0778	2.00564	14400	1	1	0	0
1587	722.512	393.138	395.144	318.16	2.00536	13517.6	2	2	0	3
1588	722.786	393.638	395.644	159.579	2.00648	6688	1	1	0	0
1589	722.95	368.625	370.633	134.567	2.00748	7840	1	1	0	0
1590	723.352	464.212	466.223	230.154	2.01093	41600	1	1	1	10
1591	723.42	540.192	542.199	612.268	2.0062	6110	2	2	0	5
1592	723.938	330.107	332.113	192.097	2.00623	16833.3	2	2	0	12
1593	723.953	329.106	331.113	190.095	2.00668	91817.4	2	2	1	15
1594	723.969	515.191	517.197	562.265	2.00593	4827	2	2	0	5
1595	724.124	496.19	498.196	262.132	2.00599	154571	1	1	2	8
1596	724.215	329.607	331.614	95.5491	2.00647	29016.7	1	1	0	0
1597	724.33	581.215	583.218	694.314	2.00297	7170	2	2	0	0
1598	724.6	552.203	554.21	636.29	2.00642	5190	2	2	0	1
1599	724.63	544.193	546.197	620.269	2.00424	5660	2	2	0	1
1600	724.645	321.595	323.603	87.5367	2.00809	4948.75	1	1	0	0
1601	724.79	506.189	508.198	544.261	2.00962	5353.33	2	2	0	6
1602	724.8	650.241	652.248	832.365	2.00735	3360	2	2	0	4
1603	725.484	464.218	466.225	230.16	2.00717	236875	1	1	0	4
1604	725.492	379.138	381.144	290.16	2.00541	15179.4	2	2	0	6
1605	725.532	373.087	375.092	139.028	2.00534	217281	1	1	2	16
1606	725.65	425.153	427.157	382.19	2.00313	7710	2	2	0	10
1607	725.97	542.189	544.191	616.262	2.00154	5530	2	2	0	5
1608	726.6	508.197	510.199	548.278	2.00174	5160	2	2	0	4
1609	727.06	505.192	507.198	542.267	2.00604	4610	2	2	0	7
1610	727.46	308.095	310.101	74.037	2.00607	110660	1	1	5	40
1611	727.61	743.281	745.29	1018.44	2.00928	3780	2	2	0	5
1612	727.675	541.204	543.21	614.292	2.00543	4105	2	2	0	4
1613	728.068	485.177	487.182	502.236	2.00556	6120	2	2	0	4
1614	728.1	550.201	552.208	632.285	2.00748	5935	2	2	0	10
1615	728.118	462.207	464.216	228.148	2.00992	676800	1	1	2	3
1616	728.4	370.126	372.134	272.136	2.00784	7800	2	2	0	8
1617	728.743	525.193	527.197	582.27	2.00421	3910	2	2	0	7
1618	729.39	317.132	319.14	83.0735	2.00817	21800	1	1	0	2
1619	730.12	733.278	735.278	998.44	2.00005	3700	2	2	0	0
1620	730.296	434.174	436.179	200.116	2.00457	40170.8	1	1	0	11
1621	730.418	512.187	514.19	556.257	2.00367	5485	2	2	0	4
1622	730.97	431.155	433.158	394.194	2.00291	6160	2	2	0	18
1623	731.09	633.24	635.246	798.364	2.00621	3000	2	2	0	2
1624	731.875	457.144	459.149	223.085	2.00592	35059.4	1	1	1	30
1625	732.07	361.128	363.136	254.139	2.00821	4930	2	2	1	14
1626	732.92	482.175	484.183	496.234	2.00763	10100	2	2	0	6
1627	733.68	403.152	405.161	338.188	2.00856	4830	2	2	0	7
1628	733.948	621.753	623.757	387.695	2.00355	6576	1	1	0	0
1629	734.06	470.166	472.172	472.215	2.00551	7090	2	2	0	2
1630	734.4	355.263	357.272	121.205	2.00938	27400	1	1	0	0
1631	734.44	475.17	477.177	482.224	2.00671	5250	2	2	0	3
1632	734.46	649.253	651.261	830.39	2.00714	3980	2	2	0	5
1633	734.553	330.127	332.133	96.0684	2.00614	31411.4	1	1	0	7
1634	735.025	528.175	530.181	588.232	2.00613	8700	2	2	0	7
1635	735.115	427.159	429.163	386.201	2.00473	5970	2	2	0	3
1636	735.27	432.16	434.166	396.204	2.0055	8460	2	2	0	24
1637	736.13	494.042	496.049	259.983	2.00709	59800	1	1	0	1
1638	736.833	494.175	496.181	260.116	2.00589	52282.9	1	1	0	13
1639	737.958	410.117	412.124	176.059	2.0064	59806.1	1	1	1	12
1640	738.365	390.143	392.149	312.169	2.00601	5105	2	2	0	12
1641	738.437	397.123	399.131	163.065	2.0078	24666.7	1	1	3	36
1642	738.68	446.127	448.134	212.069	2.00658	22250	1	1	1	12
1643	740.051	400.147	402.15	332.176	2.00386	9356.25	2	2	0	6
1644	740.33	591.224	593.232	714.331	2.0088	3320	2	2	0	4
1645	740.4	572.209	574.21	676.301	2.00149	4180	2	2	0	0
1646	740.52	504.185	506.192	540.254	2.00632	4832.5	2	2	1	13
1647	740.563	578.222	580.227	688.328	2.00458	4213.33	2	2	0	10
1648	740.736	364.625	366.631	130.566	2.00669	26006	1	1	0	0
1649	741.104	474.068	476.074	240.01	2.00563	192871	1	1	0	0
1650	741.65	365.144	367.153	131.086	2.00907	28600	1	1	0	0
1651	741.72	478.173	480.179	488.229	2.00666	6190	2	2	0	0
1652	742.203	612.266	616.279	145.156	4.01286	45207.9	1	2	1	3
1653	742.26	539.197	541.202	610.277	2.00513	2430	2	2	0	12
1654	742.53	594.218	596.228	720.32	2.00979	3600	2	2	0	0
1655	743.01	654.242	656.252	840.367	2.00991	3490	2	2	0	1
1656	743.12	665.26	667.269	862.404	2.00845	3310	2	2	0	0
1657	743.25	603.233	605.238	738.35	2.00523	3490	2	2	0	1
1658	743.28	540.197	542.201	612.278	2.00369	5040	2	2	0	11
1659	743.297	265.098	267.104	31.0392	2.00613	9396.09	1	1	1	7
1660	743.34	576.215	578.22	684.314	2.00432	3245	2	2	0	1
1661	743.75	458.156	460.163	448.195	2.00733	4765	2	2	0	2
1662	744.45	485.173	487.175	502.23	2.00212	6460	2	2	0	3
1663	744.96	663.256	665.26	858.394	2.0046	3160	2	2	0	0
1664	745.195	700.274	702.278	932.43	2.00405	3125	2	2	0	0
1665	745.22	259.552	261.558	50.9877	2.00627	26500	2	2	0	2
1666	745.313	445.163	447.17	422.21	2.007	5276.67	2	2	0	2
1667	745.46	483.177	485.182	498.237	2.00505	4580	2	2	0	5
1668	745.53	454.163	456.168	440.21	2.00475	4828.33	2	2	0	3
1669	745.685	511.186	513.195	554.255	2.00898	5450	2	2	0	2
1670	745.843	293.131	295.138	59.0725	2.00672	43743.1	1	1	1	15
1671	745.955	552.196	554.204	636.275	2.00776	5965	2	2	0	9
1672	745.97	507.181	509.189	546.246	2.00745	5820	2	2	0	2
1673	746.17	305.126	307.133	71.0676	2.00738	13300	1	1	0	0
1674	746.22	307.096	309.102	146.075	2.00555	28500	2	2	0	11
1675	746.29	551.202	553.207	634.287	2.00522	5190	2	2	0	2
1676	746.334	592.228	594.234	716.339	2.00598	4326	2	2	0	1
1677	746.34	698.265	700.27	928.414	2.00502	4550	2	2	0	0
1678	746.42	548.199	550.201	628.28	2.0028	4060	2	2	0	0
1679	746.5	596.211	598.214	724.306	2.00307	3420	2	2	0	1
1680	746.56	764.28	766.288	1060.44	2.00787	2590	2	2	0	6
1681	747.63	661.244	663.251	854.372	2.00698	4380	2	2	0	3
1682	747.98	373.272	375.28	139.214	2.00801	3580	1	1	0	0
1683	748.65	344.114	346.118	220.111	2.00397	3780	2	2	0	11
1684	748.838	554.202	556.209	640.288	2.00656	4248	2	2	0	1
1685	748.861	464.22	466.227	230.162	2.00656	115745	1	1	0	4
1686	749.342	398.135	400.141	328.153	2.00619	12750	2	2	0	9
1687	749.362	513.192	515.197	558.268	2.00406	4770	2	2	0	2
1688	749.4	598.222	600.229	728.327	2.00713	3890	2	2	0	0
1689	749.42	393.147	395.153	159.089	2.00511	30600	1	1	6	43
1690	749.476	400.142	402.149	332.168	2.00661	10870.2	2	2	0	4
1691	749.65	365.138	367.146	131.08	2.00773	15900	1	1	0	0
1692	749.67	553.209	555.214	638.3	2.00528	4775.71	2	2	0	5
1693	749.882	431.163	433.169	197.105	2.00557	20890.3	1	1	1	13
1694	749.974	322.074	324.08	88.0162	2.00598	171009	1	1	2	30
1695	750.06	479.176	481.184	490.236	2.00783	5010	2	2	0	3
1696	751.545	591.231	593.235	714.345	2.00399	4035	2	2	0	0
1697	752.04	366.14	368.148	264.164	2.00769	4530	2	2	0	4
1698	752.423	364.132	366.141	260.148	2.00865	26045.7	2	2	0	7
1699	752.58	329.112	331.117	190.108	2.00512	6750	2	2	3	17
1700	753.023	590.22	592.229	712.323	2.00936	4943.33	2	2	0	1
1701	753.605	297.088	299.095	126.06	2.00689	6943.7	2	2	0	0
1702	753.78	531.189	533.197	594.261	2.00789	4720	2	2	0	4
1703	753.97	588.22	590.228	708.323	2.00857	3810	2	2	0	1
1704	754.383	379.147	381.153	290.177	2.00629	16000	2	2	0	7
1705	754.65	560.199	562.208	652.282	2.00878	2870	2	2	0	0
1706	754.82	556.209	558.212	644.302	2.00328	3930	2	2	0	5
1707	755.15	540.19	542.198	612.262	2.00897	3460	2	2	0	3
1708	755.19	364.634	366.641	130.576	2.00683	9380	1	1	0	0
1709	755.427	459.162	461.169	450.208	2.00716	5076.67	2	2	0	2
1710	755.458	558.206	560.211	648.296	2.00412	4914	2	2	0	0
1711	755.53	584.226	586.23	700.335	2.00435	5270	2	2	0	5
1712	756.12	660.242	662.245	852.367	2.0033	4130	2	2	0	1
1713	756.316	401.651	403.656	167.592	2.00534	11785.7	1	1	0	0
1714	756.511	390.137	392.144	312.156	2.00727	9572.5	2	2	0	10
1715	756.65	628.237	630.243	788.357	2.00632	4740	2	2	0	0
1716	756.91	412.152	414.158	356.188	2.00597	7820	2	2	0	1
1717	757.05	470.172	472.175	472.228	2.0023	3690	2	2	0	1
1718	757.09	435.662	437.666	201.604	2.00389	4350	1	1	0	0
1719	757.5	296.139	298.146	62.0811	2.00656	65400	1	1	0	1
1720	757.5	303.08	305.087	69.0218	2.00645	102000	1	1	0	3
1721	757.5	382.083	384.09	148.025	2.00671	173000	1	1	0	1
1722	757.68	364.629	366.633	130.571	2.00414	11766.7	1	1	0	0
1723	757.929	422.118	424.125	188.06	2.00656	49690.9	1	1	0	4
1724	758.425	417.153	419.159	366.189	2.00667	6610	2	2	0	5
1725	758.97	578.215	580.217	688.314	2.00203	3870	2	2	0	6
1726	759.2	505.189	507.194	542.262	2.00513	3910	2	2	0	8
1727	759.381	329.107	331.113	190.096	2.00677	21005.9	2	2	1	15
1728	759.46	496.05	498.055	261.992	2.00542	6510	1	1	0	1
1729	759.557	371.633	373.64	275.149	2.00721	61800	2	2	2	13
1730	759.605	402.15	404.155	336.183	2.00487	7862.73	2	2	0	6
1731	759.615	541.198	543.2	614.279	2.00188	3920	2	2	0	3
1732	759.74	415.147	417.152	362.178	2.00488	6330	2	2	0	1
1733	759.747	329.607	331.615	95.5492	2.00721	7536.67	1	1	0	0
1734	759.938	330.111	332.118	192.106	2.00647	4877.5	2	2	0	4
1735	760.04	319.144	321.15	85.086	2.0058	17700	1	1	0	5
1736	760.13	532.187	534.197	596.257	2.01069	5730	2	2	0	17
1737	760.135	531.197	533.2	594.277	2.00295	4870	2	2	0	20
1738	760.369	400.145	402.15	332.173	2.00577	11423.3	2	2	0	8
1739	760.481	464.221	466.227	230.162	2.00641	151620	1	1	0	4
1740	762.11	545.201	547.202	622.285	2.00136	2900	2	2	0	4
1741	762.375	534.199	536.205	600.282	2.00522	4095	2	2	0	4
1742	762.885	392.147	394.151	316.176	2.00497	8785	2	2	0	3
1743	762.945	526.187	528.196	584.258	2.00846	5370	2	2	0	2
1744	763.04	592.219	594.231	716.322	2.01222	3220	2	2	0	0
1745	763.073	358.628	360.635	124.57	2.00651	5206.67	1	1	0	0
1746	763.43	411.144	413.147	354.171	2.00281	4750	2	2	0	2
1747	763.704	358.125	360.132	248.133	2.00776	19280	2	2	0	9
1748	764.875	558.199	560.202	648.281	2.00358	4660	2	2	0	5
1749	765.98	471.166	473.172	474.215	2.0059	5940	2	2	0	4
1750	766.29	422.156	424.161	188.098	2.00487	15500	1	1	0	8
1751	766.335	543.199	545.202	618.281	2.00309	3800	2	2	0	3
1752	768.315	517.19	519.195	566.264	2.00473	5415	2	2	0	6
1753	768.48	652.257	654.257	836.397	2.0005	4370	2	2	0	0
1754	768.89	640.242	642.247	812.368	2.00468	2580	2	2	0	0
1755	769.02	390.14	392.143	312.163	2.00363	6190	2	2	0	3
1756	769.887	490.183	492.189	512.249	2.00634	4253.33	2	2	0	10
1757	769.923	504.183	506.191	540.25	2.00767	8940	2	2	0	5
1758	769.95	526.178	528.184	584.239	2.0058	3210	2	2	0	4
1759	770.94	569.214	571.223	670.311	2.00924	4175	2	2	0	1
1760	771.226	344.112	346.119	220.108	2.0063	12697	2	2	1	14
1761	771.44	393.139	395.143	318.162	2.00405	9845	2	2	0	3
1762	771.925	376.132	378.14	284.148	2.00822	5840	2	2	0	4
1763	772.01	632.242	634.247	796.367	2.0055	4235	2	2	0	0
1764	772.37	443.16	445.168	418.203	2.00862	7200	2	2	0	14
1765	772.45	371.134	373.138	274.152	2.00316	11400	2	2	0	20
1766	772.82	461.164	463.173	454.212	2.00891	4950	2	2	0	4
1767	772.84	345.113	347.118	222.109	2.00522	5393.33	2	2	0	14
1768	773.071	504.178	506.186	540.24	2.00721	7803.75	2	2	0	3
1769	773.276	405.119	407.128	342.122	2.00893	18602.9	2	2	0	17
1770	773.46	344.617	346.62	110.558	2.00349	4550	1	1	0	0
1771	773.46	406.134	408.141	344.151	2.0075	6017.5	2	2	0	2
1772	773.82	405.624	407.629	171.566	2.005	4940	1	1	0	0
1773	773.82	603.228	605.234	738.34	2.00573	3430	2	2	0	3
1774	774.04	371.259	373.267	137.2	2.0082	3440	1	1	0	0
1775	774.51	553.144	555.147	319.086	2.00243	44900	1	1	0	7
1776	774.559	266.085	268.091	32.0266	2.00594	9.61078e+06	1	1	1	37
1777	774.79	266.23	268.238	32.1715	2.00796	1140000	1	1	0	0
1778	775.07	615.231	617.241	762.345	2.00989	4360	2	2	0	1
1779	775.26	464.221	466.227	230.162	2.00622	111450	1	1	0	4
1780	775.38	515.19	517.194	562.264	2.00353	5406.67	2	2	0	5
1781	775.51	529.146	531.155	295.088	2.00855	14900	1	1	0	40
1782	775.66	652.247	654.251	836.377	2.00478	3340	2	2	0	0
1783	775.925	369.124	371.133	270.132	2.00875	12555	2	2	0	5
1784	775.925	300.086	302.092	132.056	2.00596	12374.9	2	2	5	20
1785	776.34	557.207	559.213	646.298	2.00508	5990	2	2	0	3
1786	776.42	452.146	454.155	436.176	2.00873	4780	2	2	0	3
1787	776.89	532.195	534.203	596.274	2.00776	5970	2	2	0	2
1788	776.92	474.071	476.077	240.013	2.00617	22617	1	1	0	0
1789	777.11	300.587	302.594	66.5285	2.00687	5460	1	1	0	0
1790	777.61	384.138	386.144	300.16	2.00602	9700	2	2	0	0
1791	777.66	387.132	389.138	306.147	2.00613	9080	2	2	0	17
1792	777.98	369.13	371.137	270.144	2.00704	18800	2	2	0	3
1793	777.98	389.135	391.144	310.153	2.00883	5490	2	2	0	13
1794	778.49	528.182	530.19	588.247	2.00836	3380	2	2	0	1
1795	779.21	386.138	388.142	304.159	2.00388	5660	2	2	0	4
1796	779.643	570.215	572.22	672.314	2.00491	4220	2	2	0	1
1797	779.862	510.192	512.198	552.268	2.00546	5054	2	2	0	0
1798	780.09	501.182	503.184	534.247	2.0025	3730	2	2	0	3
1799	780.15	615.241	617.252	762.365	2.01099	3850	2	2	0	5
1800	780.487	368.627	370.635	134.569	2.0078	18154.2	1	1	0	0
1801	780.61	712.268	714.28	956.418	2.01287	5030	2	2	0	0
1802	780.635	364.625	366.631	130.566	2.00657	47945.6	1	1	0	0
1803	780.74	503.189	505.194	538.261	2.00499	4870	2	2	0	5
1804	780.83	365.13	367.139	131.072	2.00816	24011.1	1	1	2	10
1805	781.46	513.186	515.189	558.256	2.00244	3860	2	2	1	12
1806	782.04	336.616	338.623	102.558	2.00702	3717.5	1	1	0	0
1807	782.09	555.211	557.218	642.306	2.00641	3040	2	2	0	5
1808	782.093	445.159	447.164	422.201	2.00505	5053.33	2	2	0	0
1809	782.25	486.177	488.182	504.236	2.00556	7770	2	2	0	17
1810	782.68	416.117	418.123	182.058	2.00633	559837	1	1	6	48
1811	782.725	350.628	352.633	116.57	2.00554	14397.5	1	1	0	0
1812	783.42	475.163	477.17	482.209	2.00757	6290	2	2	0	3
1813	783.71	539.201	541.204	610.285	2.00328	3190	2	2	0	0
1814	784.03	404.152	406.155	340.187	2.0027	5190	2	2	0	9
1815	784.957	488.18	490.186	508.243	2.00635	5298.57	2	2	0	3
1816	785.788	317.129	319.138	83.071	2.00886	22200	1	1	0	2
1817	786.737	404.145	406.15	340.174	2.00515	4123.33	2	2	0	4
1818	787.09	471.317	473.325	237.259	2.00775	6740	1	1	0	1
1819	787.14	395.111	397.116	161.053	2.00498	7450	1	1	3	18
1820	787.44	476.169	478.172	484.222	2.00257	5320	2	2	0	6
1821	787.652	371.633	373.639	137.575	2.00602	8368.33	1	1	0	0
1822	788.25	290.549	292.555	56.4908	2.0059	5530	1	1	0	0
1823	788.385	496.182	498.187	524.247	2.00468	8220	2	2	0	2
1824	788.406	311.083	313.09	154.05	2.00655	87249.5	2	2	0	14
1825	788.41	519.193	521.201	570.269	2.00833	3300	2	2	0	4
1826	788.414	387.101	389.107	153.043	2.00642	115114	1	1	2	24
1827	788.65	589.222	591.234	710.326	2.01232	5270	2	2	0	0
1828	788.944	382.63	384.635	148.571	2.00573	13436.3	1	1	0	0
1829	788.975	400.142	402.148	332.168	2.00587	19278.6	2	2	0	4
1830	789.192	695.238	697.242	461.18	2.00379	15275	1	1	0	5
1831	789.2	589.231	591.234	710.345	2.00305	5750	2	2	0	0
1832	789.43	430.135	432.142	196.076	2.00717	6060	1	1	1	25
1833	789.62	561.214	563.217	654.311	2.00304	3870	2	2	0	1
1834	789.772	346.116	348.123	224.116	2.00677	62912.1	2	2	0	10
1835	789.79	431.146	433.15	394.174	2.00421	6560	2	2	0	9
1836	790.07	565.216	567.22	662.316	2.00434	4860	2	2	0	4
1837	790.3	487.181	489.192	506.246	2.01121	6800	2	2	0	1
1838	790.376	400.644	402.65	166.586	2.00584	7920	1	1	0	0
1839	790.56	517.193	519.201	566.269	2.00848	4860	2	2	0	5
1840	790.587	501.115	505.129	34.006	4.01325	143017	1	2	1	9
1841	790.717	449.165	451.17	215.107	2.00555	27162.2	1	1	0	5
1842	792.04	346.111	348.12	224.105	2.00856	7790	2	2	0	5
1843	792.296	345.097	347.103	222.078	2.00529	11412	2	2	1	53
1844	792.3	524.189	526.191	580.262	2.00146	4770	2	2	0	9
1845	792.394	345.094	347.102	222.071	2.00775	12368.1	2	2	4	70
1846	792.6	554.2	556.208	640.284	2.00825	3820	2	2	0	0
1847	792.812	363.626	365.635	129.568	2.00932	18000	1	1	0	0
1848	792.933	363.63	365.636	129.572	2.00582	14158.8	1	1	0	0
1849	793.01	457.166	459.17	446.216	2.00352	4185	2	2	0	0
1850	793.3	364.129	366.137	260.142	2.00807	12900	2	2	2	13
1851	793.46	384.133	386.139	300.149	2.0055	7070	2	2	0	3
1852	793.55	546.192	548.202	624.267	2.00991	3390	2	2	0	0
1853	793.67	663.258	665.268	858.399	2.01024	2810	2	2	0	0
1854	794.04	611.236	613.239	754.355	2.00268	4070	2	2	0	2
1855	796.182	621.159	625.172	154.049	4.0137	72091.7	1	2	0	14
1856	796.37	497.183	499.193	526.249	2.01042	4610	2	2	0	6
1857	796.42	509.19	511.195	550.264	2.00481	3895	2	2	0	2
1858	797.74	575.224	577.226	682.331	2.00177	3680	2	2	0	0
1859	798.16	615.236	617.243	762.356	2.00697	3630	2	2	0	0
1860	798.57	454.167	456.17	440.217	2.003	5700	2	2	0	6
1861	798.67	508.191	510.2	548.266	2.00836	6880	2	2	0	1
1862	798.943	475.174	477.179	482.231	2.00524	5980	2	2	0	6
1863	799.085	560.206	562.211	652.295	2.00568	3860	2	2	0	0
1864	799.13	364.634	366.64	130.576	2.00565	5770	1	1	0	0
1865	799.25	469.169	471.173	470.221	2.0042	6910	2	2	0	2
1866	799.35	483.171	485.176	498.226	2.00473	9100	2	2	0	2
1867	799.39	393.152	395.157	318.188	2.00471	7760	2	2	1	17
1868	799.658	530.19	532.197	592.264	2.00636	4390	2	2	0	9
1869	799.772	346.075	348.081	112.017	2.00631	148217	1	1	2	10
1870	799.79	324.124	326.129	180.131	2.00558	3800	2	2	0	7
1871	800.39	362.123	364.132	256.129	2.00887	15000	2	2	0	10
1872	800.52	371.632	373.639	275.148	2.00667	91350	2	2	2	13
1873	801.39	366.141	368.145	264.165	2.00443	3900	2	2	0	4
1874	801.775	315.61	317.617	81.5518	2.00667	20272.7	1	1	0	0
1875	801.924	364.133	366.14	260.15	2.0068	17382.7	2	2	0	7
1876	802.08	372.133	374.14	138.075	2.00703	27300	1	1	0	4
1877	802.107	494.191	496.194	520.265	2.00282	7667.5	2	2	0	3
1878	802.26	493.186	495.19	518.255	2.00452	4190	2	2	1	2
1879	802.28	494.179	496.189	520.242	2.0095	4270	2	2	0	5
1880	802.37	485.177	487.188	502.238	2.01079	6840	2	2	0	2
1881	803.392	315.109	317.117	162.101	2.00862	130707	2	2	1	18
1882	803.568	307.598	309.605	73.5392	2.00747	5252.86	1	1	0	0
1883	803.75	311.089	313.095	154.061	2.00582	7060	2	2	1	24
1884	804.42	478.183	480.188	488.249	2.00533	4600	2	2	1	51
1885	804.977	425.117	427.124	191.059	2.00614	35783.3	1	1	2	31
1886	805.005	515.183	517.189	562.249	2.00603	4995	2	2	0	2
1887	806.157	523.189	525.195	578.262	2.0061	5413.33	2	2	0	1
1888	806.353	386.144	388.149	304.172	2.00462	12342.2	2	2	0	16
1889	806.67	559.205	561.217	650.294	2.01208	4170	2	2	0	3
1890	806.791	356.036	358.04	121.977	2.00437	17128.6	1	1	0	1
1891	807.681	339.12	341.125	105.062	2.00524	36959	1	1	0	2
1892	807.7	375.124	377.132	282.131	2.00789	8744.29	2	2	0	10
1893	808.27	291.08	293.086	57.0213	2.00666	10200	1	1	0	5
1894	808.45	429.154	431.162	390.192	2.00733	4840	2	2	0	6
1895	808.625	464.22	466.227	230.162	2.00629	56757.6	1	1	0	4
1896	808.67	458.16	460.171	448.204	2.01122	6520	2	2	0	2
1897	809.268	490.178	492.184	512.24	2.00612	4800	2	2	0	4
1898	809.884	328.614	330.621	94.5561	2.00697	8685.32	1	1	0	0
1899	810.9	440.161	442.165	412.205	2.00379	9940	2	2	0	17
1900	811.01	350.627	352.632	233.138	2.00519	73550	2	2	0	1
1901	811.03	471.165	473.168	474.213	2.00255	5010	2	2	0	4
1902	811.44	418.179	420.184	184.121	2.00509	20800	1	1	0	5
1903	811.625	576.206	578.217	684.296	2.01022	4080	2	2	0	3
1904	811.65	456.172	458.174	444.227	2.00236	7380	2	2	0	7
1905	812.411	363.139	365.143	129.08	2.00405	72900	1	1	4	30
1906	812.84	343.12	345.129	218.123	2.00881	5050	2	2	0	6
1907	812.99	534.202	536.207	600.288	2.00489	5195	2	2	0	3
1908	813.36	665.241	667.25	862.366	2.00885	4700	2	2	0	0
1909	813.42	517.186	519.192	566.255	2.00677	5000	2	2	0	3
1910	813.44	365.14	367.144	131.082	2.00338	4160	1	1	0	0
1911	813.68	369.132	371.136	270.147	2.00439	7900	2	2	0	3
1912	813.75	624.234	626.238	780.352	2.00345	3220	2	2	0	1
1913	813.78	576.22	578.224	684.322	2.00472	4840	2	2	0	4
1914	813.99	558.194	560.199	648.271	2.00523	4490	2	2	0	10
1915	814.37	460.164	462.171	452.211	2.00723	4200	2	2	0	1
1916	814.82	365.136	367.139	131.077	2.00319	17800	1	1	1	4
1917	815.07	650.169	652.176	416.111	2.00672	23900	1	1	0	23
1918	815.42	554.205	556.21	640.294	2.00524	5130	2	2	0	4
1919	816.154	364.625	366.631	130.566	2.00644	31340	1	1	0	0
1920	816.573	365.132	367.138	131.073	2.00668	12610	1	1	2	10
1921	816.717	300.104	302.11	132.091	2.00633	7131.82	2	2	2	19
1922	816.97	515.193	517.199	562.269	2.00639	4580	2	2	0	4
1923	817.31	624.219	626.225	780.321	2.00545	3300	2	2	0	0
1924	817.67	480.16	482.168	246.102	2.00787	16500	1	1	0	12
1925	817.95	592.224	594.23	716.33	2.00636	3450	2	2	0	0
1926	817.993	434.174	436.179	200.116	2.00494	27833.3	1	1	0	11
1927	818.05	444.166	446.171	420.216	2.00405	5170	2	2	0	23
1928	818.16	513.191	515.194	558.264	2.00359	4650	2	2	0	2
1929	818.957	430.179	432.184	196.12	2.00548	36942.3	1	1	0	9
1930	819.36	468.163	470.166	468.21	2.0024	5820	2	2	0	6
1931	819.366	335.622	337.628	101.563	2.00621	9717.4	1	1	0	0
1932	820.23	471.173	473.176	474.229	2.00379	5606.67	2	2	0	4
1933	820.869	395.107	397.112	161.048	2.00584	258593	1	1	3	21
1934	821.04	532.188	534.192	596.26	2.00391	3750	2	2	0	20
1935	821.06	529.2	531.205	590.283	2.00537	3390	2	2	0	8
1936	821.17	379.14	381.148	290.164	2.0078	4120	2	2	0	6
1937	821.78	603.228	605.232	738.339	2.0043	3760	2	2	0	3
1938	821.89	574.213	576.215	680.309	2.00222	2590	2	2	0	1
1939	821.99	566.208	568.214	664.299	2.0059	4065	2	2	0	1
1940	822.17	510.185	512.193	552.254	2.00777	6760	2	2	0	9
1941	822.266	389.15	391.158	155.092	2.00746	31492.3	1	1	0	16
1942	822.47	443.159	445.167	418.202	2.00753	6220	2	2	0	14
1943	822.568	535.246	537.253	301.188	2.0065	33720	1	1	0	9
1944	822.571	407.153	409.159	346.19	2.0063	15812.5	2	2	0	3
1945	822.68	594.217	596.227	720.317	2.00981	3140	2	2	0	0
1946	823.81	556.21	558.214	644.304	2.00369	3715	2	2	0	7
1947	823.944	358.128	360.134	248.139	2.00629	10527.2	2	2	1	17
1948	824.7	541.204	543.209	614.291	2.0049	4390	2	2	0	2
1949	824.75	489.182	491.187	510.247	2.00489	5470	2	2	0	22
1950	824.89	562.207	564.213	656.298	2.00524	3480	2	2	0	0
1951	825.39	508.187	510.19	548.258	2.00316	5405	2	2	0	2
1952	825.503	542.196	544.2	616.275	2.00395	3885	2	2	0	1
1953	825.64	638.242	640.246	808.367	2.00414	3430	2	2	0	7
1954	825.785	530.194	532.2	592.272	2.0058	4685	2	2	0	1
1955	825.9	582.219	584.221	696.321	2.00212	4500	2	2	0	2
1956	826.12	307.595	309.601	73.5369	2.0054	13200	1	1	0	0
1957	826.41	570.216	572.222	672.314	2.0067	2290	2	2	0	1
1958	826.66	631.24	633.241	794.364	2.00061	3600	2	2	0	1
1959	827.029	307.095	309.101	146.074	2.0057	30097.1	2	2	4	39
1960	827.102	550.201	552.206	632.286	2.00442	4550	2	2	0	6
1961	827.31	375.136	377.139	282.155	2.00306	5200	2	2	0	6
1962	827.45	303.12	305.129	69.0621	2.0081	8490	1	1	0	2
1963	828.036	371.632	373.639	275.148	2.00652	89853.3	2	2	2	13
1964	828.044	305.127	307.133	71.0691	2.00586	10712	1	1	0	6
1965	829.949	311.087	313.094	154.058	2.00719	7290	2	2	0	1
1966	829.98	593.23	595.236	718.344	2.00575	3410	2	2	0	0
1967	830.568	360.132	362.137	252.147	2.0057	4611	2	2	0	7
1968	831.31	449.174	451.177	430.232	2.00271	5380	2	2	0	2
1969	832.177	584.221	586.225	700.325	2.00427	4430	2	2	0	2
1970	832.285	510.192	512.195	552.267	2.00336	4865	2	2	0	0
1971	832.663	437.095	439.101	203.037	2.0065	11766.7	1	1	0	2
1972	832.8	379.137	381.144	290.158	2.00666	9580	2	2	0	2
1973	832.98	581.216	583.226	694.314	2.01061	2540	2	2	0	0
1974	833.13	410.655	412.662	176.596	2.00683	8940	1	1	0	0
1975	833.45	486.176	488.187	504.235	2.01116	4010	2	2	0	16
1976	833.506	462.205	464.212	228.146	2.00749	73861.2	1	1	2	3
1977	833.69	607.234	609.237	746.352	2.00247	4030	2	2	0	1
1978	833.696	317.13	319.139	83.072	2.0085	21361.4	1	1	0	2
1979	833.82	498.205	500.211	264.147	2.00532	30900	1	1	0	11
1980	834.31	577.208	579.219	686.3	2.0112	3160	2	2	0	3
1981	834.31	657.25	659.258	846.383	2.00774	3910	2	2	0	1
1982	834.375	356.122	358.127	122.064	2.00469	19900	1	1	0	3
1983	834.4	542.2	544.206	308.142	2.00578	8680	1	1	0	20
1984	834.469	399.138	401.144	165.079	2.00637	1.17109e+06	1	1	4	49
1985	834.612	354.116	356.121	120.057	2.00579	27623.7	1	1	2	18
1986	835.64	328.603	330.609	189.089	2.00665	18925	2	2	0	3
1987	835.69	696.26	698.271	924.404	2.01052	4070	2	2	0	0
1988	835.84	484.181	486.186	500.246	2.00423	4480	2	2	0	8
1989	836.09	531.199	533.206	594.281	2.00731	5350	2	2	0	16
1990	836.196	336.114	338.121	204.112	2.00664	745608	2	2	0	12
1991	836.37	376.127	378.131	284.138	2.00336	6410	2	2	1	20
1992	836.75	336.616	338.622	205.115	2.00622	241500	2	2	0	3
1993	837.09	374.117	376.126	280.117	2.00948	7840	2	2	0	18
1994	837.25	416.148	418.152	364.18	2.00311	6490	2	2	0	12
1995	837.67	675.234	677.235	441.176	2.00097	19234	1	1	0	14
1996	837.72	532.193	534.199	596.27	2.00585	2860	2	2	0	0
1997	838.31	576.201	578.204	684.285	2.00343	4140	2	2	0	2
1998	839.06	373.273	375.28	139.214	2.00742	10735	1	1	0	0
[truncated: 2,602 more rows]
